# Supplementary material
Source: publisher figshare collection journal article supplement (https://tandf.figshare.com/ndownloader/files/17937107)
Supplement: Supplementary file 1 [file 17937107]

**Supporting Information**

**In silico evaluation of pesticides as potential modulators of human DNA Methyltransferases**

N. Coronado-Posada, J. Olivero-Verbel

*Environmental and Computational Chemistry Group. School of Pharmaceutical Sciences, University of Cartagena, Colombia

Environmental and Computational Chemistry Group, School of Pharmaceutical Sciences, Zaragocilla Campus, University of Cartagena, Cartagena, 130015, Colombia.

*. Corresponding author:

Jesus Olivero-Verbel.

Environmental and Computational Chemistry Group

School of Pharmaceutical Sciences

Zaragocilla Campus

University of Cartagena, Cartagena, 130015

Colombia.

Tel.: +57 (5) 6698179, 57 (5) 6698180; fax: +57 (5) 6698323.

E-mail address: joliverov@unicartagena.edu.co

**CONTENT**

**Figure S1.** Chemical structure of the compounds with better affinities for the DNMTs.

**Figure S2**:

A-1. Complex Bromadiolone-DNMT1. A-2. An approach to the complex. A-3. Interaction with amino acids. B-1: Complex Bromadiolone-DNMT3. B-2. An approach to the complex. B-3. Interaction with amino acids.

C-1. Complex Difenacoum-DNMT1. C-2. An approach to the complex. C-3. Interaction with amino acids. D-1: Complex Difenacoum -DNMT3. D-2. An approach to the complex. D-3. Interaction with amino acids

E-1. Complex Hrydrometylon-DNMT1. E-2. An approach to the complex. E-3. Interaction with amino acids. F-1: Complex Hrydrometylon -DNMT3. F-2. An approach to the complex. F-3. Interaction with amino acids

**Figure S3.** Correlation between ligand binding affinities (Kcal/mol) for DNMT1 and DNMT3.

**Table S1.** AutoDock Vina affinities Total scores for Both Training and Test Sets on DNMT1 and DNMT13Structures

**Table S2**. Physicochemical properties of the compounds with the best affinity values for both proteins DNMTs

**Table S4.** RMSD Values for the Best Obtained Poses of Co-crystallized Ligand vs Experimental on DNMTs Binding Sites Using

**Table S5.** AutoDock Vina affinities Total scores for DNMTis and theirs half maximal inhibitory concentrations (IC50).


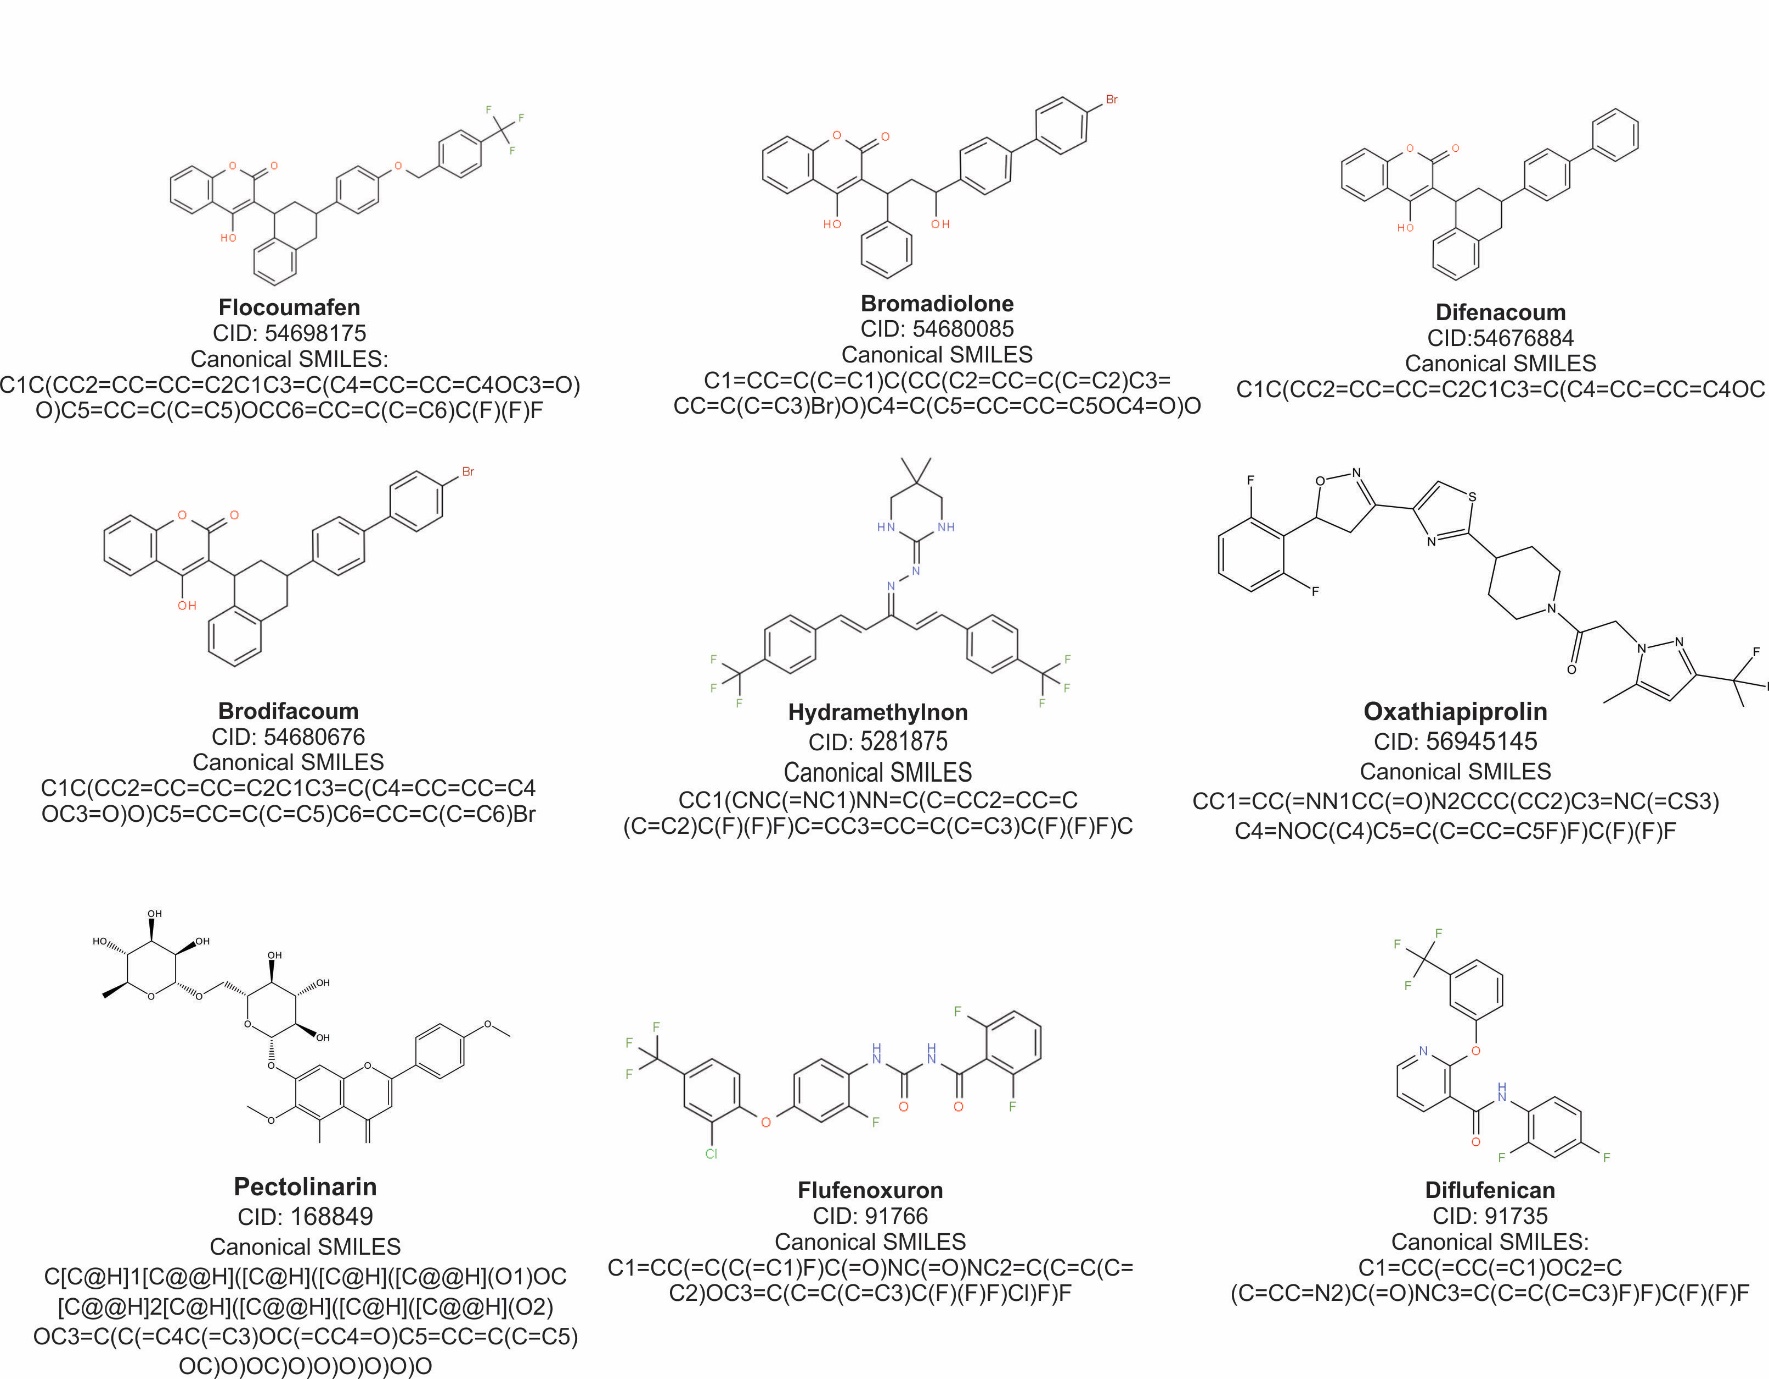
**Figure 1S.** Chemical structure of the compounds with better affinities for the DNMTs.


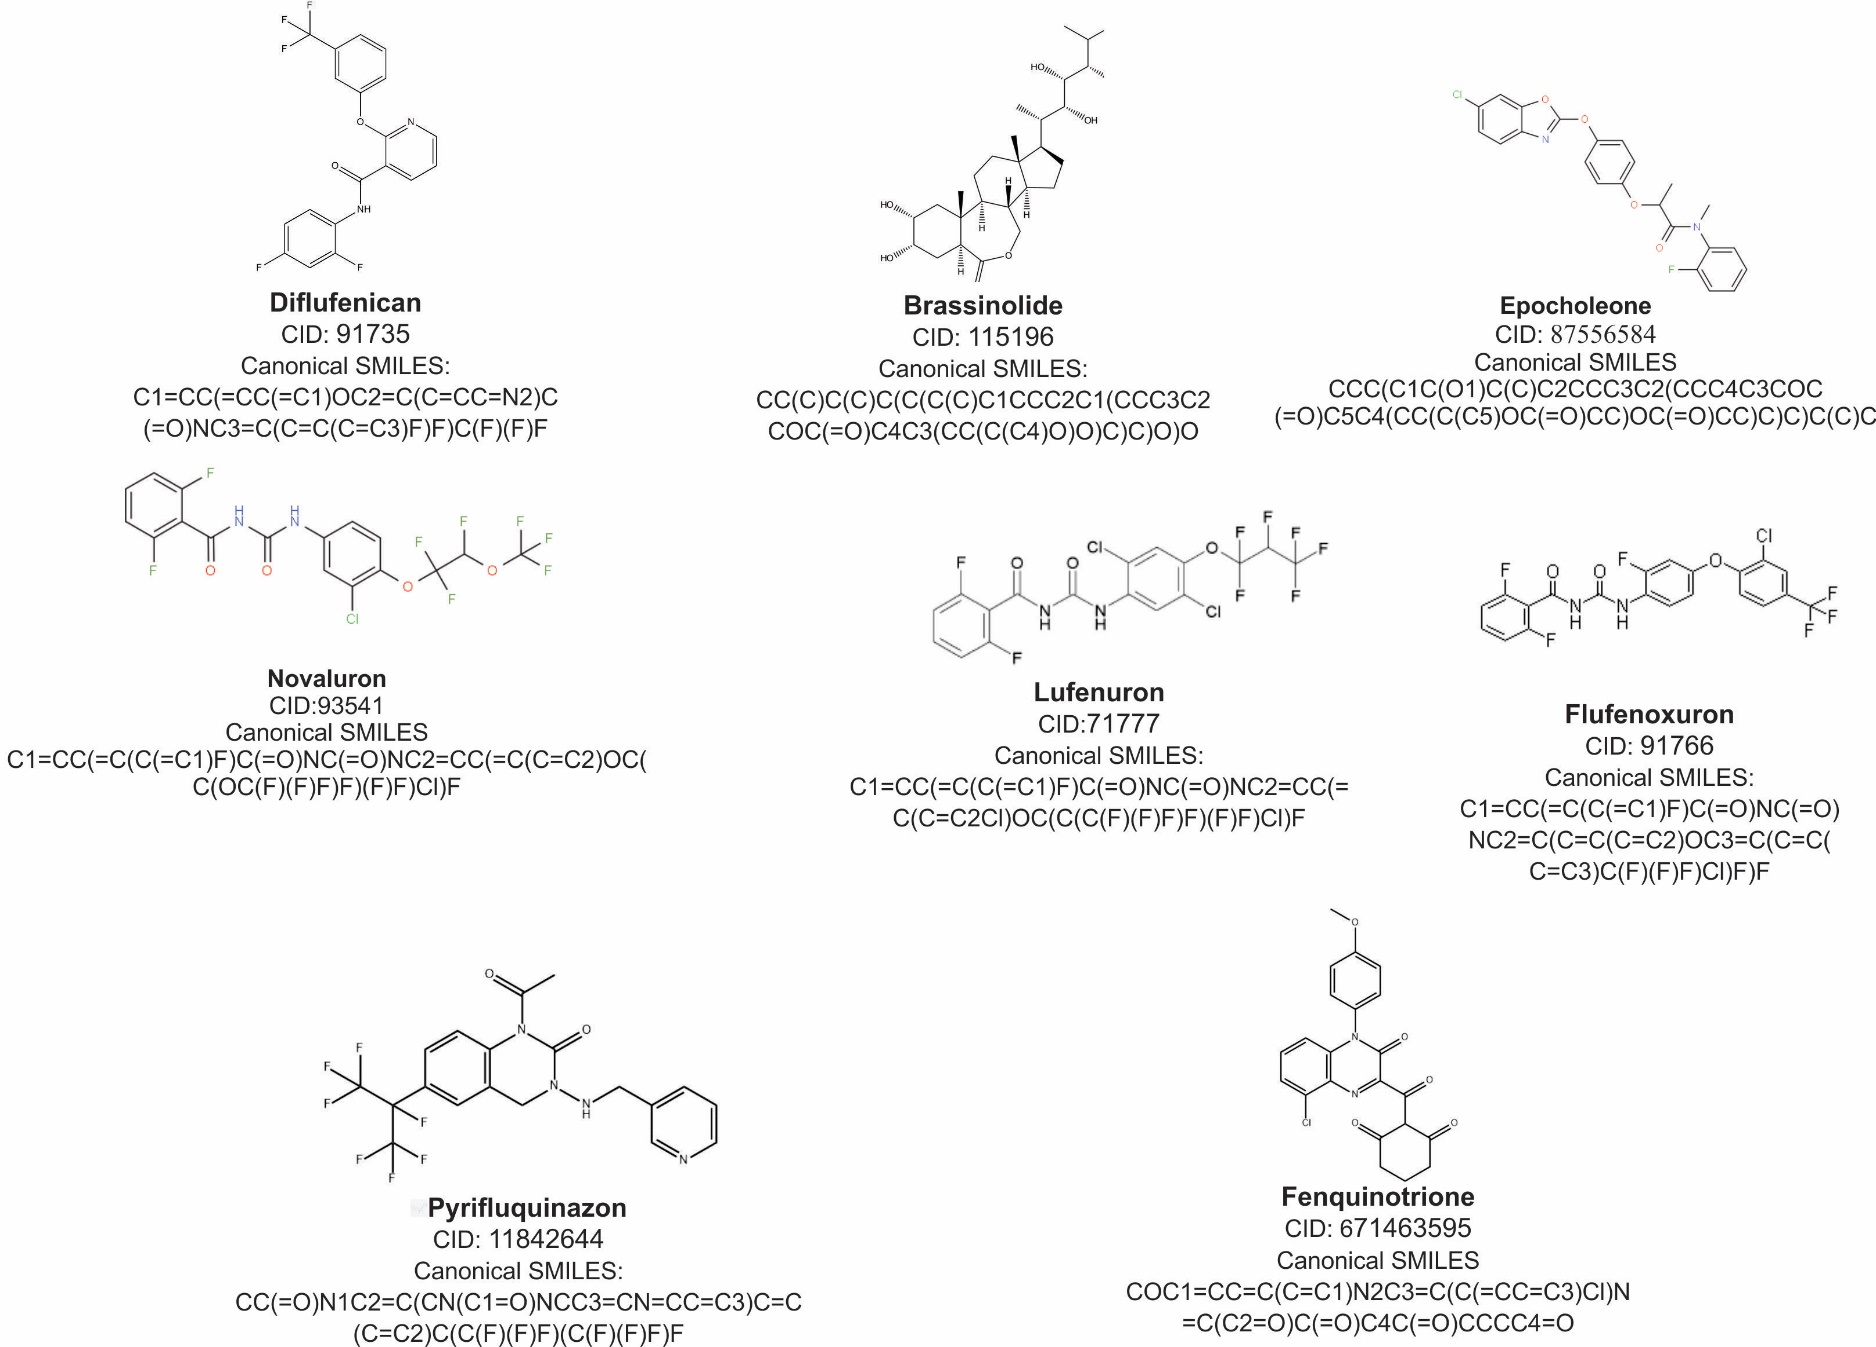


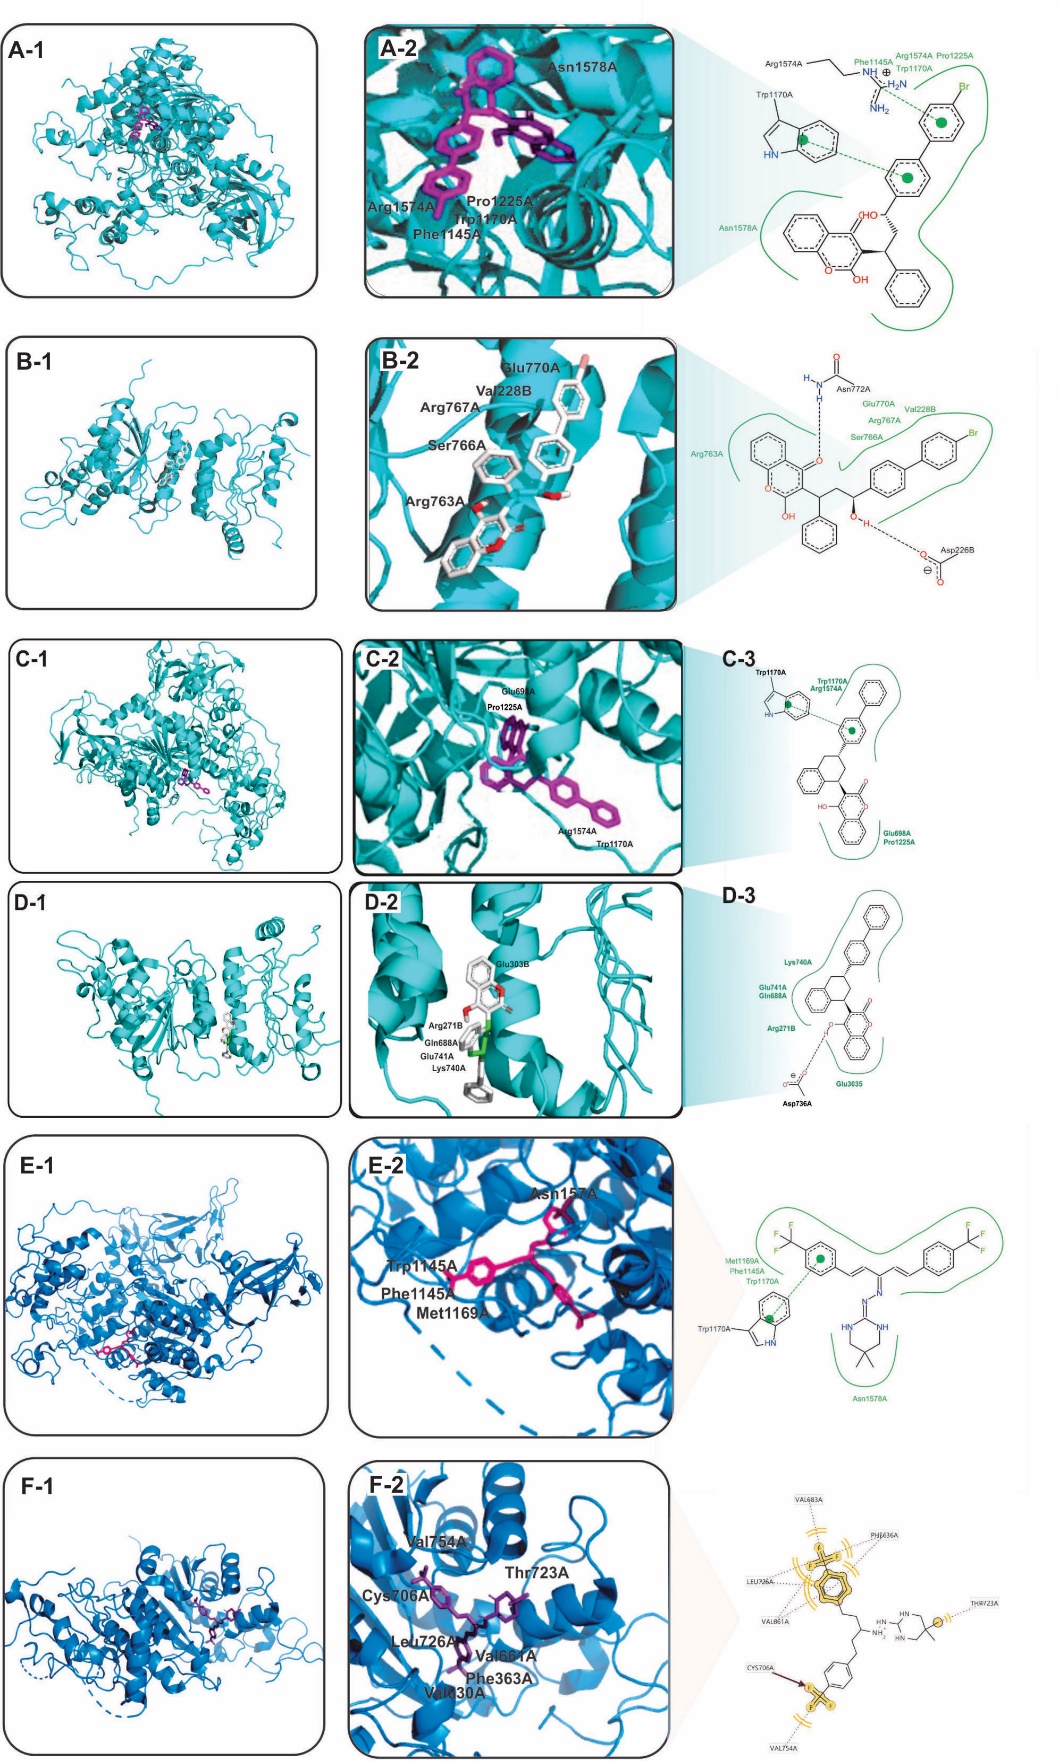


**Figure 2S**: A-1. Complex Bromadiolone-DNMT1. A-2. An approach to the complex. A-3. Interaction with amino acids. B-1: Complex Bromadiolone-DNMT3. B-2. An approach to the complex. B-3. Interaction with amino acids.


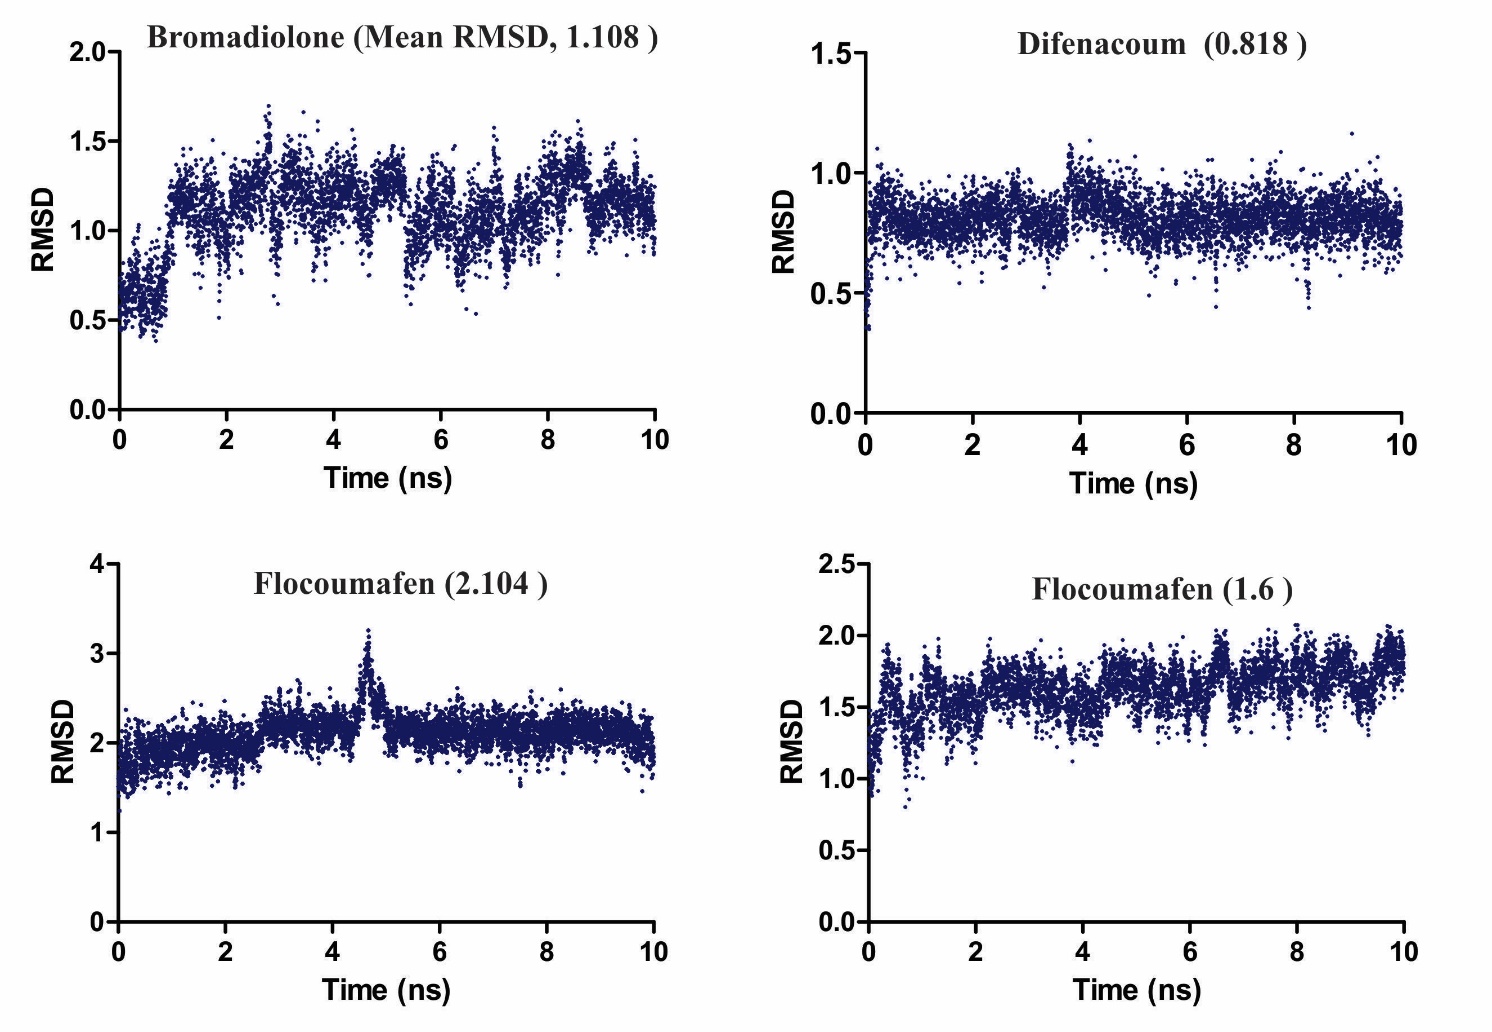


**Figure 3S.** RMSD values from molecular dynamics simulations.


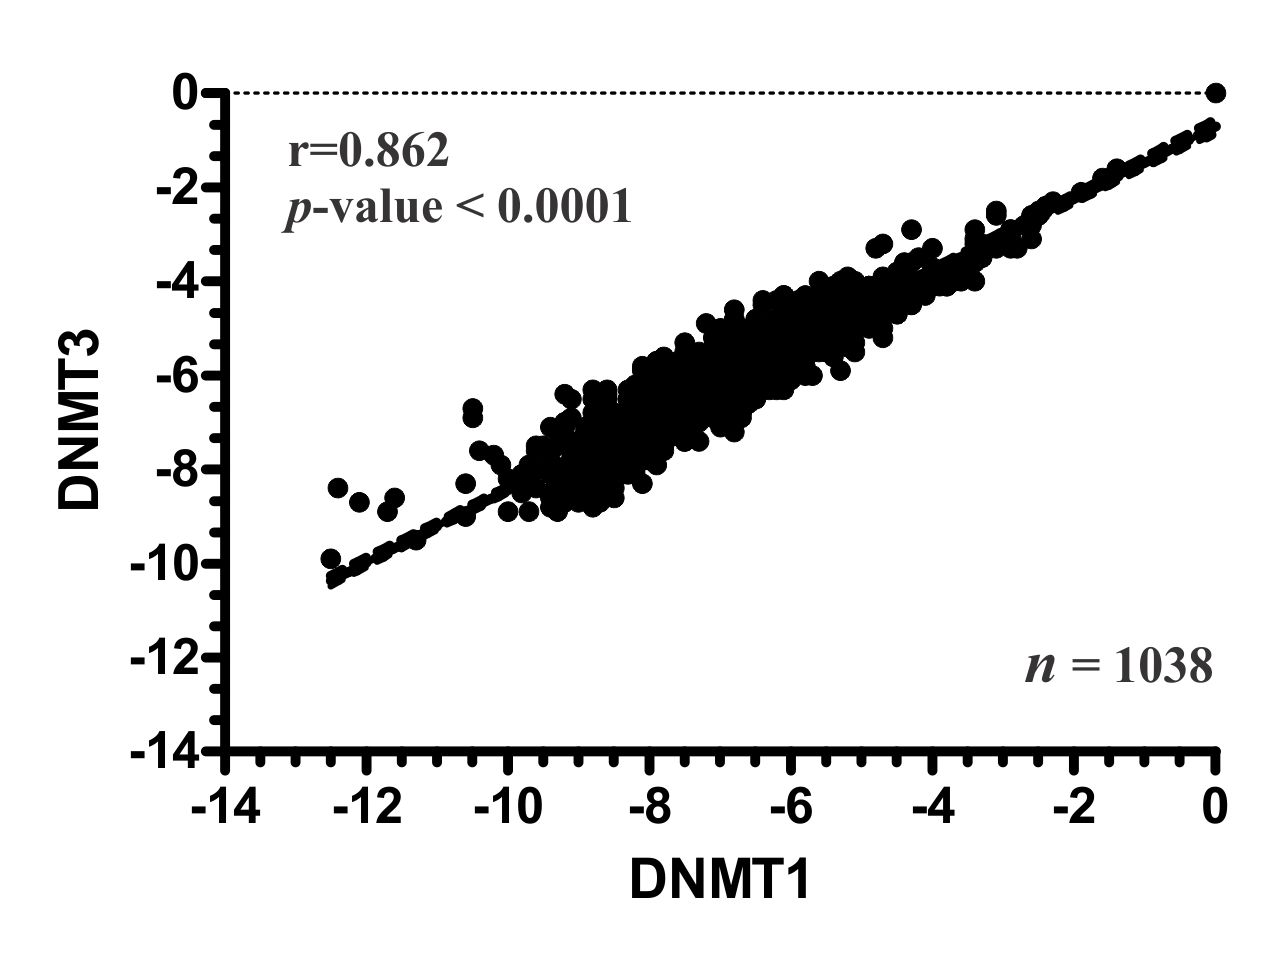


**Figure 4S.** Correlation between ligand binding affinities (Kcal/mol) for DNMT1 and DNMT3.

**Table 1S.** Additional features of the Molecular Dynamics simulation.

| Steps | Simulation time [ps] | Ensemble | 1Harmonic restraints |
| --- | --- | --- | --- |
| 2Equilibration 1 | 100 | NVT | heavy atoms of protein-ligand |
| 3Equilibration 2 | 100 | NPT | heavy atoms of protein-ligand |
| Equilibration 3 | 100 | NPT | Protein backbone |
| Equilibration 4 | 100 | NPT | none |
| Production | 10000 | NPT | none |
| 1. Using a force constant of 1 kcal/molA2 | | | |
| 1. Gradual heating (prior 500 steps of steepest descent) each 6 ps by 25 K from initial temperature 25 K until 298 K for a total of 72 ps. After, run for 28 ps at 298 K, in total 100 ps. | | | |
| 1. Equilibration at 298 K and 1 atm | | | |

**Table 2S.** AutoDock Vina affinities Total scores for Both Training and Test Sets on DNMT1 and DNMT13 Structures

| N° | GROUPS | CID | COMPOUND | Aff DNMT1 | Aff DNMT3 |
| --- | --- | --- | --- | --- | --- |
| 1 | Acylalanin | 42504 | Furalaxyl | -6,3 | -5,4 |
| 2 | Alcohol | 263 | Butan-1-ol | -3,4 | -3,5 |
| 3 | Aldehyde | 3485 | Glutaraldehyde | -3,6 | -4,0 |
| 4 | Aliphaticalcohol | 702 | Ethanol | -2,6 | -2,6 |
| 5 | Alkanamide | 13728 | Diphenamid | -7,0 | -6,1 |
| 6 | Alkanamide | 27189 | napropamide | -7,7 | -6,7 |
| 7 | Alkanamide | 6578 | Propionamide | -3,4 | -3,5 |
| 8 | Alkylchlorophenoxy | 1486 | 2,4-dichlorophenoxyacetic acid | -6,5 | -5,8 |
| 9 | Alkyliodide | 6328 | Iodomethane | -1,4 | -1,6 |
| 10 | Alkylphenol | 1752 | Nonilfenol | -6,3 | -6,1 |
| 11 | Amide | 13013865 | Isocarbamide | -7,7 | -6,7 |
| 12 | Amide | 157025 | Diclocymet | -9,2 | -8,5 |
| 13 | Amide | 35699 | Benzipram | -6,0 | -5,8 |
| 14 | Amide | 71657865 | Quinonamid | -7,9 | -6,7 |
| 15 | Amidine | 64949 | propamidine | -8,2 | -7,5 |
| 16 | Amine | 24730 | Triisopropanolamine | -5,5 | -5,1 |
| 17 | Amine | 8576 | Difenilamina | -7,4 | -5,6 |
| 18 | Anilide | 15457339 | Ipfencarbazone | -8,8 | -7,0 |
| 19 | Anilide | 162992 | Xylachlor | -6,0 | -4,9 |
| 20 | Anilide | 16826 | Pentanochlor | -6,9 | -5,8 |
| 21 | Anilide | 23715 | Monalide | -6,6 | -5,9 |
| 22 | Anilide | 2804318 | Tiadinil | -7,8 | -6,5 |
| 23 | Anilide | 32597 | Pyracarbolid | -7,2 | -6,5 |
| 24 | Anilide | 40413 | Naproanilide | -8,9 | -8,3 |
| 25 | Anilide | 40896 | Mefluidide | -7,9 | -7,6 |
| 26 | Anilide | 4933 | Propanil | -6,1 | -5,9 |
| 27 | Anilide | 50590 | Cyprofuram | -6,7 | -5,5 |
| 28 | Anilide | 71679243 | Pyraziflumid | -8,5 | -7,5 |
| 29 | Aniline | 688020 | Crotamiton | -6,1 | -5,0 |
| 30 | Anilinopyrimidine | 86296 | Mepanipyrim | -7,6 | -7,1 |
| 31 | Anilinopyrimidine | 91650 | Pyrimethanil | -7,1 | -6,8 |
| 32 | Aromatichydrocarbon | 17432 | Etridiazole | -5,8 | -5,3 |
| 33 | Aromatichydrocarbon | 931 | Naphthalene | -5,8 | -5,9 |
| 34 | Aryaminopropionicacid | 40520 | Flamprop-isopropyl | -7,1 | -6,0 |
| 35 | Aryaminopropionicacid | 40521 | Flamprop-methyl | -7,2 | -6,2 |
| 36 | Aryaminopropionicacid | 42807 | Flamprop | -6,9 | -6,4 |
| 37 | Aryloxyalkanoicacid | 119435 | Dichlorprop-P | -6,8 | -5,9 |
| 38 | Aryloxyalkanoicacid | 185588 | Mecoprop-P | -6,9 | -6,0 |
| 39 | Aryloxyalkanoicacid | 32876 | MCPA-thioethyl | -6,2 | -5,3 |
| 40 | Aryloxyalkanoicacid | 7153 | Mecoprop | -6,4 | -5,7 |
| 41 | Aryloxyalkanoicacid | 7204 | (4-Chloro-2-methylphenoxy)acetic acid | -6,3 | -5,9 |
| 42 | Aryloxyalkanoicacid | 7207 | 4-(4-Chloro-2-methylphenoxy)butanoic acid | -6,5 | -5,6 |
| 43 | Aryloxyalkanoicacid | 8427 | Dichlorprop | -6,4 | -5,9 |
| 44 | Aryloxyphenoxypropionate | 13363033 | Haloxyfop-P-methyl | -8,3 | -7,7 |
| 45 | Aryloxyphenoxypropionate | 1617113 | Quizalofop-p-ethyl | -8,4 | -7,7 |
| 46 | Aryloxyphenoxypropionate | 16213016 | Shogun | -8,9 | -8,4 |
| 47 | Aryloxyphenoxypropionate | 174656 | Isoxapyrifop | -8,2 | -7,5 |
| 48 | Aryloxyphenoxypropionate | 3033674 | Fluazifop-P-butyl | -8,3 | -7,6 |
| 49 | Aryloxyphenoxypropionate | 38687 | Diclofop | -8,3 | -7,2 |
| 50 | Aryloxyphenoxypropionate | 39985 | Diclofop-methyl | -7,8 | -7,1 |
| 51 | Aryloxyphenoxypropionate | 448979 | Haloxyfop-P | -8,7 | -8,1 |
| 52 | Aryloxyphenoxypropionate | 47938 | Fenoxaprop-ethyl | -8,3 | -7,5 |
| 53 | Aryloxyphenoxypropionate | 50895 | Haloxyfop | -8,7 | -8,3 |
| 54 | Aryloxyphenoxypropionate | 50897 | Fluazifop-butyl | -7,9 | -7,3 |
| 55 | Aryloxyphenoxypropionate | 53518 | Quizalofop-ethyl | -8,3 | -7,4 |
| 56 | Aryloxyphenoxypropionate | 59558935 | Metamifop | -9,7 | -7,9 |
| 57 | Aryloxyphenoxypropionate | 86175 | Quizalofop-P-tefuryl | -9,3 | -8,6 |
| 58 | Aryloxyphenoxypropionate | 91707 | Fenoxaprop-P-ethyl | -8,4 | -7,4 |
| 59 | Aryloxyphenoxypropionate | 91743 | Haloxyfop-etotyl | -8,1 | -7,7 |
| 60 | Aryltriazolinone | 86369 | Sulfentrazone | -8,6 | -6,3 |
| 61 | Auxina | 26229 | 4-Chlorophenoxyacetic acid | -6,0 | -5,7 |
| 62 | Auxina | 6861 | 1-Naphthaleneacetamide | -7,3 | -6,6 |
| 63 | Benzamide | 11158353 | Fluopyram | -9,1 | -7,9 |
| 64 | Benzamide | 122087 | Zoxamide | -7,3 | -6,2 |
| 65 | Benzamide | 158659 | 4-Chloro-N-(2-cyanoethoxymethyl)benzamide | -6,5 | -5,9 |
| 66 | Benzamide | 73672 | Isoxaben | -8,2 | -6,5 |
| 67 | Benzamide | 92299 | Butam | -6,9 | -5,3 |
| 68 | Benzanilide | 23466 | Mebenil | -7,4 | -6,7 |
| 69 | Benzanilide | 41632 | Mepronil | -7,9 | -7,0 |
| 70 | Benzanilide | 53469 | Tecloftalam | -7,9 | -6,7 |
| 71 | Benzenamine | 12896 | Disperse Orange 3 | -7,3 | -6,3 |
| 72 | Benzene-dicarboxamide | 11193251 | Flubendiamide | -8,9 | -7,4 |
| 73 | Benzimidazole | 19756 | Fuberidazole | -6,9 | -7,0 |
| 74 | Benzimidazole | 20055210 | Mecarbinzid | -7,6 | -6,0 |
| 75 | Benzimidazole | 3032791 | Thiophanate-methyl | -6,9 | -6,4 |
| 76 | Benzimidazole | 34280 | Cypendazole | -7,3 | -6,7 |
| 77 | Benzimidazole | 5430 | Thiabendazole | -6,7 | -6,2 |
| 78 | Benzimidazole | 62208 | Debacarb | -6,8 | -6,4 |
| 79 | Benzisothiazole | 91587 | Probenazole | -7,2 | -6,1 |
| 80 | Benzofuran | 33360 | Ethofumesate | -7,5 | -6,6 |
| 81 | Benzofuran | 441140 | Griseofulvin | -7,3 | -6,1 |
| 82 | Benzoicacid | 3030 | Dicamba | -6,3 | -5,3 |
| 83 | Benzonitrile | 2734819 | Chlorthiamid | -5,5 | -4,8 |
| 84 | Benzonitrile | 3031 | Dichlobenil | -5,2 | -4,6 |
| 85 | Benzophenone | 6451057 | Metrafenone | -6,6 | -6,4 |
| 86 | Benzothiazinone | 2328 | Bentazon | -7,5 | -6,8 |
| 87 | Benzothiazole | 156003 | Fenthiaprop | -8,5 | -7,4 |
| 88 | Benzothiazole | 7392985 | Fenthiaprop-p-ethyl | -8,3 | -7,5 |
| 89 | Benzotriazine | 93422 | Triazoxide | -7,9 | -6,6 |
| 90 | Benzoxazine | 62306 | Benoxacor | -7,3 | -6,3 |
| 91 | Benzoylcyclohexanedione | 71463595 | Fenquinotrione | -10,0 | -8,2 |
| 92 | Benzoylpyrazole | 42619 | Pyrazolynate | -8,6 | -7,8 |
| 93 | Benzoylpyrazole | 44473182 | Tolpyralate | -7,7 | -6,7 |
| 94 | Benzoylpyridine | 23082663 | Pyriofenone | -6,6 | -6,3 |
| 95 | Benzoylurea | 37123 | Diflubenzuron | -8,4 | -7,7 |
| 96 | Benzoylurea | 47445 | Triflumuron | -8,8 | -8,0 |
| 97 | Benzoylurea | 6537963 | Flucycloxuron | -10,6 | -8,3 |
| 98 | Benzoylurea | 71777 | Lufenuron | -10,2 | -7,7 |
| 99 | Benzoylurea | 91734 | Teflubenzuron | -9,2 | -8,7 |
| 100 | Benzoylurea | 91741 | Hexaflumuron | -9,1 | -6,9 |
| 101 | Benzoylurea | 91766 | Flufenoxuron | -10,1 | -7,9 |
| 102 | Benzoylurea | 93541 | Novaluron | -10,4 | -7,6 |
| 103 | Benzoylurea | 9828359 | Noviflumuron | -9,4 | -7,9 |
| 104 | Bipyridylium | 15939 | Paraquat | -6,3 | -5,3 |
| 105 | Bipyridylium | 6795 | Diquat | -7,0 | -5,9 |
| 106 | Bishydrazide | 24781705 | TUCSJFNYZJYLHE-UHFFFAOYSA-N | -8,9 | -8,1 |
| 107 | Bridgeddiphenyl | 16685 | Tetrasul | -7,0 | -6,4 |
| 108 | Bridgeddiphenyl | 28768 | Parinol | -8,2 | -6,8 |
| 109 | Bridgeddiphenyl | 8305 | Tetradifon | -7,3 | -6,7 |
| 110 | Bridgeddiphenyl | 9836 | Fluorbenside | -7,0 | -6,3 |
| 111 | Butenolide | 16752772 | Flupyradifurone | -7,1 | -6,7 |
| 112 | Carbamate | 10788 | Dazomet | -4,5 | -3,8 |
| 113 | Carbamate | 12923188 | Fenasulam [ISO] | -8,6 | -8,2 |
| 114 | Carbamate | 14322 | Metolcarb | -6,1 | -6,0 |
| 115 | Carbamate | 16248 | Methiocarb | -6,6 | -5,5 |
| 116 | Carbamate | 17040 | Xylylcarb | -6,5 | -6,1 |
| 117 | Carbamate | 17516 | Promecarb | -7,1 | -6,7 |
| 118 | Carbamate | 17517 | Cyclohexanone Oxime | -6,5 | -5,6 |
| 119 | Carbamate | 19588 | Fenobucarb | -6,6 | -5,7 |
| 120 | Carbamate | 20055207 | Iodobonil [ISO] | -5,7 | -5,0 |
| 121 | Carbamate | 23421 | Dioxacarb | -7,3 | -5,7 |
| 122 | Carbamate | 24685 | Propham | -6,0 | -5,9 |
| 123 | Carbamate | 24743 | Desmedipham | -8,3 | -7,5 |
| 124 | Carbamate | 24744 | Phenmedipham | -8,4 | -7,2 |
| 125 | Carbamate | 25550 | 2,3,5-Trimethylphenyl methylcarbamate | -6,8 | -6,0 |
| 126 | Carbamate | 28699 | Formparanate | -7,1 | -6,6 |
| 127 | Carbamate | 3000605 | Ethylenebisdithiocarbamic Acid | -4,2 | -3,5 |
| 128 | Carbamate | 3001858 | Metam | -2,9 | -3,0 |
| 129 | Carbamate | 31645 | Pirimicarb | -6,7 | -5,6 |
| 130 | Carbamate | 32490 | Propamocarb | -5,1 | -4,9 |
| 131 | Carbamate | 34766 | Ethiofencarb | -6,4 | -5,5 |
| 132 | Carbamate | 36603 | Endodan | -4,7 | -3,9 |
| 133 | Carbamate | 36733 | Promacyl | -7,3 | -6,2 |
| 134 | Carbamate | 38235 | Thiofanox | -5,9 | -4,7 |
| 135 | Carbamate | 47759 | Furathiocarb | -8,0 | -7,4 |
| 136 | Carbamate | 4944 | Propoxur | -6,4 | -5,4 |
| 137 | Carbamate | 51605 | Fenoxycarb | -7,8 | -7,2 |
| 138 | Carbamate | 5353758 | Lannate | -5,1 | -5,0 |
| 139 | Carbamate | 5360854 | Thiocarboxime | -5,6 | -5,1 |
| 140 | Carbamate | 5455 | Thiram | -4,5 | -4,0 |
| 141 | Carbamate | 56945144 | Picarbutrazox | -9,3 | -8,1 |
| 142 | Carbamate | 57957886 | Tolprocarb | -8,2 | -7,4 |
| 143 | Carbamate | 6143 | m-Cumenyl methylcarbamate | -6,8 | -6,3 |
| 144 | Carbamate | 62155 | Nivral | -6,3 | -5,3 |
| 145 | Carbamate | 8393 | Isolane | -6,6 | -5,8 |
| 146 | Carbamate | 91742 | Diethofencarb | -6,5 | -6,0 |
| 147 | Carbamate | 91751432 | CGLLFTAWFYORRL-UHFFFAOYSA-N | -8,0 | -6,3 |
| 148 | Carbamate | 9414 | Mexacarbate | -6,9 | -5,5 |
| 149 | Carbamate | 9570637 | Nitrilacarb | -5,9 | -5,3 |
| 150 | Carbamate | 9595287 | Oxamyl | -5,8 | -4,6 |
| 151 | Carbamato | 11722 | Methyl Carbamate | -3,4 | -3,5 |
| 152 | Carbamato | 2566 | Carbofuran | -7,3 | -6,6 |
| 153 | Carbamato | 27975 | 3-Hydroxycarbofuran | -8,3 | -6,5 |
| 154 | Carbamoyltriazole | 86306 | Triazamate | -6,7 | -6,5 |
| 155 | Carbanilate | 94578 | Phenisopham | -8,5 | -7,5 |
| 156 | Carboxamide | 13218777 | Hexythiazox | -8,1 | -7,3 |
| 157 | Carboxamide | 86389 | Thifluzamide | -7,8 | -6,4 |
| 158 | Carboxamide | 88916 | Metsulfovax | -7,2 | -6,5 |
| 159 | Carboxamide | 91735 | Diflufenican | -10,6 | -9,0 |
| 160 | Carboxamide | 91827029 | DGOAXBPOVUPPEB-QMMMGPOBSA-N | -7,9 | -6,0 |
| 161 | Chlorinatedhydrocarbon | 11 | 1,2-Dichloroethane | -2,5 | -2,6 |
| 162 | Chlorinatedhydrocarbon | 12418 | 1,1,1,2-Tetrachloroethane | -3,4 | -2,9 |
| 163 | Chlorinatedhydrocarbon | 6278 | 1,1,1-Trichloroethane | -3,1 | -2,6 |
| 164 | Chlorinatedhydrocarbon | 6365 | 1,1-Dichloroethane | -2,6 | -2,8 |
| 165 | Chlorinatedhydrocarbon | 6564 | 1,2-Dichloropropane | -3,0 | -3,2 |
| 166 | Chlorinatedhydrocarbon | 8370 | Hexachlorobenzene | -5,9 | -4,9 |
| 167 | Chlorinatedhydrocarbon | 969491 | Dieldrin | -7,0 | -5,3 |
| 168 | Chloroacetamide | 13633097 | Dimethenamid-P | -5,1 | -4,2 |
| 169 | Chloroacetamide | 13633097 | Dimethenamid-P | -5,1 | -4,2 |
| 170 | Chloroacetamide | 39722 | Dimethachlor | -5,6 | -5,2 |
| 171 | Chloroacetamide | 4169 | Metolachlor | -5,8 | -5,1 |
| 172 | Chloroacetamide | 443036 | Thenylchlor | -6,4 | -4,4 |
| 173 | Chloroacetamide | 4931 | Propachlor | -6,5 | -5,5 |
| 174 | Chloroacetamide | 49384 | Metazachlor | -6,5 | -5,2 |
| 175 | Chloroacetamide | 6450826 | Pethoxamid | -5,8 | -6,0 |
| 176 | Chloroacetamide | 91644 | Pretilachlor | -5,6 | -5,5 |
| 177 | Chloroacetanilide | 165195 | Terbuchlor | -6,3 | -5,9 |
| 178 | Chloroacetanilide | 167454 | Propisochlor | -6,0 | -5,4 |
| 179 | Chloroacetanilide | 30559 | Prynachlor | -6,5 | -5,5 |
| 180 | Chloroacetanilide | 32321 | Delachlor | -6,0 | -5,7 |
| 181 | Chloroacetanilide | 39238 | Daimuron | -8,1 | -7,2 |
| 182 | Chloroacetanilide | 6448437 | Butenachlor | -6,2 | -5,9 |
| 183 | Chloroaniline | 36392 | Fluchloralin | -6,2 | -5,3 |
| 184 | Chloronitrile | 15910 | Chlorothalonil | -5,7 | -5,0 |
| 185 | Chloronitrophenol | 4477 | Niclosamide | -8,4 | -7,2 |
| 186 | ChlorophenoxyAcidoEster | 7542 | Cloprop | -6,4 | -6,0 |
| 187 | Chlorophenyl | 6720 | Pentachloronitrobenzene | -6,1 | -5,4 |
| 188 | Chlorophenyl | 7430 | 2,6-Dichloro-4-nitroaniline | -6,0 | -5,5 |
| 189 | Chlorophenyl | 8330 | Tecnazene | -6,0 | -5,3 |
| 190 | Chlorophenyl | 91664 | Tolclofos-methyl | -6,1 | -5,6 |
| 191 | Chlorotriazine | 81091 | Eglinazine-ethyl | -6,3 | -6,3 |
| 192 | Cineole | 6434236 | Kinoprene | -6,2 | -6,3 |
| 193 | Conazole | 37907 | Climbazole | -7,0 | -5,7 |
| 194 | Conazole | 53309 | Diclobutrazol | -6,8 | -6,1 |
| 195 | Conazole | 71230671 | Mefentrifluconazole | -8,8 | -7,5 |
| 196 | Conazole | 91673 | Etaconazole | -7,1 | -6,0 |
| 197 | Coumarinanticoagulant | 54678486 | Warfarin | -8,0 | -7,8 |
| 198 | Coumarinanticoagulant | 54680085 | Bromadiolone | -11,6 | -8,6 |
| 199 | Coumarinanticoagulant | 54698175 | Flocoumafen | -12,5 | -9,9 |
| 200 | Coumarinanticoagulant | 91771 | Difethialone | -9,8 | -8,5 |
| 201 | Cresol | 7771 | 2,4-Dimethylphenol | -5,3 | -5,1 |
| 202 | CyanoacetamideOxime | 5364079 | Cymoxanil | -6,0 | -6,1 |
| 203 | CyanoacetamideOxime | 9862076 | Cyazofamid | -6,7 | -6,0 |
| 204 | Cyclicamide | 13387 | N-Methyl-2-pyrrolidone | -3,9 | -4,0 |
| 205 | Cyclicaromatic | 5794 | Piperonyl Butoxide | -6,7 | -6,3 |
| 206 | Cyclicether | 31275 | 1,4-Dioxane | -3,3 | -3,5 |
| 207 | Cyclictrimerofformaldehyde | 8081 | s-Trioxane | -3,4 | -3,5 |
| 208 | Cyclodiene | 12310946 | Compound 711 | -6,8 | -4,6 |
| 209 | Cyclodiene | 17357 | Chlorbicyclen | -5,8 | -4,6 |
| 210 | Cyclodiene | 91759 | Flumetsulam | -8,3 | -7,0 |
| 211 | Cyclohexane | 92421 | Trinexapac-ethyl | -7,1 | -6,9 |
| 212 | Cyclo-octane | 61021 | Metaldehyde | -6,0 | -4,9 |
| 213 | CyclopropanecarboxAmide | 153847 | Carpropamid | -8,2 | -6,2 |
| 214 | Diacylhydrazine | 10157484 | Chromafenozide | -8,7 | -8,1 |
| 215 | Diacylhydrazine | 91773 | Tebufenozide | -8,2 | -7,1 |
| 216 | Dialkylnitrosamine | 6124 | N-Nitrosodimethylamine | -3,4 | -3,1 |
| 217 | Dicarboximide | 15457485 | Benzfendizone | -9,7 | -8,1 |
| 218 | Dicarboximide | 158434 | Flumipropyn | -8,7 | -7,3 |
| 219 | Dicarboximide | 36242 | Procymidone | -7,9 | -6,0 |
| 220 | Dicarboximide | 37517 | Iprodione | -8,8 | -6,5 |
| 221 | Dicarboximide | 443048 | Flumiclorac-pentyl | -8,4 | -7,9 |
| 222 | Dicarboximide | 5851439 | Cinidon-ethyl | -8,7 | -7,9 |
| 223 | Dicarboximide | 92350 | Myclozolin | -7,5 | -6,3 |
| 224 | Dicarboximide | 93228 | Fluoroimide | -7,0 | -6,5 |
| 225 | Dicarboxylicacid | 3225 | Endothall | -6,3 | -5,5 |
| 226 | Diethylester | 8554 | Dimethyl Phthalate | -6,1 | -5,5 |
| 227 | Dimethylcarbamate | 12798249 | Hyquincarb | -7,1 | -6,3 |
| 228 | Dinitroaniline | 15966 | Dipropalin | -5,8 | -5,1 |
| 229 | Dinitroaniline | 20848 | Nitralin | -6,1 | -5,2 |
| 230 | Dinitroaniline | 29393 | Oryzalin | -6,3 | -5,5 |
| 231 | Dinitroaniline | 33500 | Profluralin | -6,7 | -5,4 |
| 232 | Dinitroaniline | 34468 | Dinitramine | -6,0 | -5,4 |
| 233 | Dinitroaniline | 34469 | Prodiamine | -6,2 | -5,4 |
| 234 | Dinitroaniline | 36565 | Butralin | -7,6 | -6,7 |
| 235 | Dinitroaniline | 36606 | Isopropalin | -6,1 | -5,1 |
| 236 | Dinitroaniline | 38479 | Pendimethalin | -6,7 | -5,7 |
| 237 | Dinitroaniline | 41381 | Ethalfluralin | -6,6 | -5,5 |
| 238 | Dinitroaniline | 5569 | Trifluralin | -6,3 | -5,3 |
| 239 | Dinitrophenol | 10234 | Binapacryl | -7,5 | -6,2 |
| 240 | Dinitrophenol | 13783 | Dinobuton | -6,8 | -6,4 |
| 241 | Dinitrophenol | 14994 | Dinoterb | -7,2 | -6,2 |
| 242 | Dinitrophenol | 169442 | Dinocton | -7,2 | -6,8 |
| 243 | Dinitrophenol | 17776 | Dinoseb Acetate | -6,7 | -6,0 |
| 244 | Dinitrophenol | 19745588 | Dinopenton | -6,4 | -6,3 |
| 245 | Dinitrophenol | 19898 | Medinoterb | -6,8 | -6,0 |
| 246 | Dinitrophenol | 20041 | Dinosam | -7,0 | -7,1 |
| 247 | Dinitrophenol | 20544356 | Dinosulfon | -6,6 | -5,9 |
| 248 | Dinitrophenol | 295464 | Etinofen | -6,8 | -6,3 |
| 249 | Dinitrophenol | 305544 | Medinoterb Acetate | -6,5 | -5,7 |
| 250 | Dinitrophenol | 43707 | Dinofenate | -7,9 | -7,1 |
| 251 | Dinitrophenol | 5284389 | Meptyldinocap | -7,9 | -6,4 |
| 252 | Dinitrophenol | 6950 | Dinoseb | -6,9 | -6,4 |
| 253 | Dinitrophenol | 8540 | Dinex | -7,7 | -7,2 |
| 254 | Diphenylether | 62276 | Lactofen | -8,4 | -8,1 |
| 255 | Diphenylether | 15787 | Nitrofen | -7,7 | -7,3 |
| 256 | Diphenylether | 18772433 | Ethoxyfen-ethyl | -9,2 | -8,0 |
| 257 | Diphenylether | 39230 | Bifenox | -8,0 | -6,6 |
| 258 | Diphenylether | 39327 | Oxyfluorfen | -8,3 | -7,1 |
| 259 | Diphenylether | 92389 | Aclonifen | -7,6 | -6,8 |
| 260 | Diphenylether | 92395 | Fluoroglycofen | -9,3 | -8,2 |
| 261 | Diphenyloxazoline | 153974 | Etoxazole | -9,3 | -8,1 |
| 262 | Ether | 8115 | Bis(2-chloroethyl) ether | -3,4 | -3,6 |
| 263 | Ethylenegenerator | 27982 | Ethephon | -4,1 | -4,2 |
| 264 | Ethylenegenerator | 7860 | Glyoxal | -2,6 | -3,1 |
| 265 | Fenanilide | 90590 | Fenfuram | -7,1 | -6,5 |
| 266 | Fluoroalkyltriazine | 44146693 | Indaziflam | -9,0 | -7,7 |
| 267 | Formamidine | 22544 | Chlordimeform | -5,8 | -5,4 |
| 268 | Formamidine | 31099 | Formetanate | -6,8 | -6,1 |
| 269 | Furamide | 43359 | Furmecyclox | -6,7 | -6,9 |
| 270 | Furanilide | 34313 | Methfuroxam | -7,7 | -6,8 |
| 271 | Gametocide | 197225 | Fenridazon | -7,6 | -6,2 |
| 272 | Halogenatedaliphaticcompound | 69789 | 2,2,3,3-Tetrafluoropropionic acid | -4,7 | -5,2 |
| 273 | Halogenatedalkane | 7280 | 1,2-Dibromo-3-chloropropane | -3,3 | -3,2 |
| 274 | Heteroaramatic | 33528 | Octhilinone | -5,3 | -5,1 |
| 275 | Heterocyclicfluoroalkenylsulfone | 11534927 | Fluensulfone | -6,8 | -6,1 |
| 276 | Hetrocyclic | 3037 | Dichlorophen | -7,7 | -6,3 |
| 277 | Hydrocarbon | 6492 | Dicyclopentadiene | -5,8 | -4,8 |
| 278 | Hydroxyanilide | 213031 | Fenhexamid | -7,8 | -6,3 |
| 279 | Hydroxybenzonitrile | 15531 | Bromoxynil | -5,5 | -5,2 |
| 280 | Hydroxybenzonitrile | 15533 | Bromoxynil Octanoate | -6,6 | -5,5 |
| 281 | Hydroxybenzonitrile | 20055550 | Bromobonil | -6,7 | -5,6 |
| 282 | Hydroxybenzonitrile | 62119 | Bromoxynil Heptanoate | -6,5 | -5,3 |
| 283 | Hydroxybenzonitrile | 62526 | Bromoxynil Butyrate | -6,0 | -5,2 |
| 284 | Hydroxycoumarin | 54676884 | Difenacoum | -12,1 | -8,7 |
| 285 | Hydroxycoumarin | 54680676 | Brodifacoum | -12,4 | -8,4 |
| 286 | Imidazole | 37175 | Imazalil | -6,6 | -6,2 |
| 287 | Imidazole | 43523 | Fenapanil | -6,4 | -5,4 |
| 288 | Imidazole | 43523 | Fenapanil | -6,4 | -5,4 |
| 289 | Imidazole | 73665 | Prochloraz | -7,2 | -5,9 |
| 290 | Imidazolinone | 3034382 | Imazamethabenz | -8,6 | -6,4 |
| 291 | Imidazolinone | 54738 | Imazapyr | -8,1 | -5,9 |
| 292 | Imidazolinone | 54739 | Imazaquin | -8,6 | -6,7 |
| 293 | Imidazolinone | 54740 | Imazethapyr | -7,9 | -6,3 |
| 294 | Imidazolinone | 86137 | Imazamox | -7,7 | -6,0 |
| 295 | Imidazolinone | 91770 | Imazapic | -7,9 | -6,4 |
| 296 | Imine | 93542 | Fluthiacet-methyl | -8,8 | -7,2 |
| 297 | Indandione | 6732 | Pindone | -7,1 | -6,7 |
| 298 | Indandioneanticoagulant | 19402 | Chlorophacinone | -9,6 | -7,5 |
| 299 | Indandioneanticoagulant | 6585 | Peracetic Acid | -3,7 | -4,0 |
| 300 | Indandioneanticoagulant | 6719 | Diphacinone | -9,1 | -7,4 |
| 301 | Indazole | 119653 | Ethychlozate | -6,7 | -6,5 |
| 302 | Inorganiccompound | 1176 | Urea | -3,4 | -3,2 |
| 303 | Inorganiccompound | 17607 | Sulfuryl Fluoride | -3,4 | -4,0 |
| 304 | Inorganiccompound | 6323 | Methyl Bromide | -1,5 | -1,8 |
| 305 | Isoflavones | 168849 | Pectolinarin | -10,7 | -8,7 |
| 305 | Inorganiccompound | 784 | Hydrogen Peroxide | -2,7 | -2,8 |
| 306 | Isothiazolone | 17520 | 1,2-Benzisothiazol-3(2H)-one | -5,7 | -5,3 |
| 307 | Isoxazolidinone | 54778 | Clomazone | -7,4 | -5,8 |
| 308 | Juvenilehormoneanalogue | 92420 | Cinosulfuron | -7,9 | -7,6 |
| 309 | Juvenilehormonemimic | 42272 | Epofenonane | -7,3 | -6,6 |
| 310 | Juvenilehormonemimic | 5366546 | Methoprene | -7,1 | -5,5 |
| 311 | Juvenilehormonemimic | 91699 | Triflumizole | -7,0 | -5,7 |
| 312 | Ketone | 7909 | Methyl Isobutyl Ketone | -3,9 | -4,1 |
| 313 | Ketone | 8303 | Hexachloroacetone | -4,8 | -3,3 |
| 314 | Keto-pyrrole | 3033871 | N-Octyl-2-pyrrolidone | -5,4 | -5.0 |
| 315 | Malonanilate | 11097730 | Cyclanilide | -7,7 | -6,2 |
| 316 | Mercaptobenzothiazole | 30692 | Thiocyanic acid, (2-benzothiazolylthio)methyl ester | -6,1 | -5,3 |
| 318 | Methoxytriazine | 33443 | Secbumeton | -6,5 | -5,8 |
| 319 | Methoxytriazine | 4928 | Prometon | -6,6 | -5,8 |
| 320 | Methylthiotriazine | 13904 | Desmetryn | -6,2 | -5,6 |
| 321 | Methylthiotriazine | 31573 | Dimethametryn | -6,7 | -5,6 |
| 322 | Micro-organismderived | 6223 | Gliotoxin | -7,5 | -7.0 |
| 323 | Micro-organismderived | 6223 | Gliotoxin | -7,5 | -7.0 |
| 324 | Micro-organismderived | 65174 | Kasugamycin | -7,8 | -7,6 |
| 325 | Morphactin | 10087 | Flurenol | -8,1 | -7,4 |
| 326 | Morphactin | 14748849 | Chlorfluren-methyl | -8,4 | -7.0 |
| 327 | Morphactin | 17169 | Chlorflurenol | -7,9 | -7,9 |
| 328 | Morphactin | 17334 | Chlorflurenol-methyl | -7,5 | -7,4 |
| 329 | Morphactin | 20055552 | Chlorfluren | -8,2 | -7,4 |
| 330 | Morphactin | 40816 | Flurenol-butyl | -7,8 | -7,4 |
| 331 | Morpholine | 18996 | Piperalin | -7,7 | -7,1 |
| 332 | Morpholine | 32518 | Tridemorph | -6,6 | -5,5 |
| 333 | Morpholine | 5889665 | Dimethomorph E | -8,1 | -7,4 |
| 334 | Morpholine | 61899 | Dodemorph | -7,6 | -6,8 |
| 335 | Morpholine | 86160 | Spiroxamine | -7,6 | -5,7 |
| 336 | Morpholine | 93365 | Fenpropimorph | -8,2 | -6,8 |
| 337 | Morpholinederivative | 14993 | Trifenmorph | -8.0 | -6,1 |
| 338 | Neonicotinoid | 184601 | Imidaclothiz | -6,4 | -6.0 |
| 339 | Neonicotinoid | 197701 | Scorpion | -6,3 | -5,5 |
| 340 | Neonicotinoid | 213027 | Mallorepine | -6,2 | -5,5 |
| 341 | Neonicotinoid | 3033155 | 2H-1,3-Thiazine, tetrahydro-2-(nitromethylene)- | -5,3 | -4,9 |
| 342 | Neonicotinoid | 3034287 | Nitenpyram | -6,8 | -6,4 |
| 343 | Neonicotinoid | 44571837 | MOTGVPXRLDDMSK-UHFFFAOYSA-N | -7,4 | -7,3 |
| 344 | Neonicotinoid | 5821911 | Thiamethoxam [ISO] | -6,8 | -6,1 |
| 345 | Neonicotinoid | 76325977 | Guadipyr | -6,8 | -7,2 |
| 346 | Neonicotinoid | 86418 | N-[1-[(6-Chloro-3-pyridinyl)methyl]-4,5-dihydroimidazol-2-yl]nitramide | -7.0 | -6,4 |
| 347 | NereistoxinAnalogue | 87176 | Bensultap | -8,7 | -6,9 |
| 348 | Nitroanisole | 36250 | Chlomethoxyfen | -8,1 | -6,6 |
| 349 | Nitrophenyl | 157602 | Furyloxyfen | -8,8 | -7,6 |
| 350 | Nitrophenyl | 27295 | Fluorodifen | -8,6 | -8,1 |
| 351 | Nitrophenyl | 44073 | Acifluorfen | -9.0 | -7,6 |
| 352 | Nitrosamine | 20680 | N-Ethyl-N-nitrosobutylamine | -4,1 | -4,3 |
| 353 | Not classified | 106664 | (3-Acetyloxy-2-nitro-3-phenylpropyl) acetate | -6,5 | -5,9 |
| 354 | Not classified | 10760 | Butopyronoxyl | -6,6 | -6.0 |
| 355 | Not classified | 10942862 | Benclothiaz | -5,5 | -4,9 |
| 356 | Not classified | 11236201 | Benzobicyclon | -8,6 | -7,9 |
| 357 | Not classified | 11387 | 2,6-Dimethylnaphthalene | -6,6 | -6,4 |
| 358 | Not classified | 114994 | Halofenozide | -7,6 | -6,7 |
| 359 | Not classified | 11707647 | Cyprosulfamide | -8,5 | -7,9 |
| 360 | Not classified | 11714234 | Pentoxazone | -8,9 | -7,2 |
| 361 | Not classified | 11911 | 5-Aminoquinoline | -6,2 | -5,5 |
| 362 | Not classified | 12040175 | Bethoxazin | -7,1 | -6,7 |
| 363 | Not classified | 12232 | Dimethyl Disulfide | -2,3 | -2,3 |
| 364 | Not classified | 122903 | Dehydroacetic Acid | -6,1 | -5,8 |
| 365 | Not classified | 12542 | Fluoroacetamide | -3,3 | -3,5 |
| 366 | Not classified | 127198 | Thiosultap | -5,8 | -5,3 |
| 367 | Not classified | 133730 | Flupropadine | -9,2 | -7,4 |
| 368 | Not classified | 14392535 | Thidiazimin | -9,2 | -6,4 |
| 369 | Not classified | 15331 | Daminozide | -5,5 | -5,4 |
| 370 | Not classified | 15604135 | Oxaziclomefone | -7,8 | -7,5 |
| 371 | Not classified | 157722 | Karetazan | -6,6 | -5,9 |
| 372 | Not classified | 16004 | Nitrapyrin | -5,7 | -4,7 |
| 373 | Not classified | 17112 | Glyphosine | -6,1 | -5,7 |
| 374 | Not classified | 1711973 | S-Methoprene | -7,3 | -5,7 |
| 375 | Not classified | 17808 | Proximpham | -6,5 | -6,5 |
| 376 | Not classified | 184900 | Prohexadione | -6,5 | -5,4 |
| 377 | Not classified | 19232 | Chlorflurazole | -7,3 | -7,4 |
| 378 | Not classified | 20288 | Fluenetil | -7,5 | -6,2 |
| 379 | Not classified | 20448 | Mucochloric Anhydride | -7,3 | -5,8 |
| 380 | Not classified | 2078 | Alachlor | -5,4 | -5,3 |
| 381 | Not classified | 210326 | Pinoxaden | -7,1 | -5,9 |
| 382 | Not classified | 2272 | Azobenzene | -6,6 | -5,9 |
| 383 | Not classified | 22772 | Methylene Dithiocyanate | -3,5 | -3,8 |
| 384 | Not classified | 22883 | Cloxyfonac | -6,1 | -5,9 |
| 385 | Not classified | 229052 | Ethylicin | -4.0 | -4.0 |
| 386 | Not classified | 23256 | 5-Chloro-3-methyl-4-nitro-1H-pyrazole | -5,3 | -5.0 |
| 387 | Not classified | 2450 | Bronopol | -4,5 | -4,4 |
| 388 | Not classified | 257232 | 2-Cyano-2-phenylbutanamide | -6,2 | -5,1 |
| 389 | Not classified | 263158 | 2-(2-Furyl)-1,3-dioxolane | -5,1 | -5,5 |
| 390 | Not classified | 26597 | Fenazaflor | -8,9 | -7,6 |
| 391 | Not classified | 26693 | Chlorfenprop-methyl | -6,1 | -5,8 |
| 392 | Not classified | 27159 | Cartap | -5,6 | -5,4 |
| 393 | Not classified | 3026 | Dibutyl Phthalate | -6,5 | -6,2 |
| 394 | Not classified | 3033865 | Fenchlorazole-ethyl | -7,1 | -5,8 |
| 395 | Not classified | 3033865 | Fenchlorazole-ethyl | -7,1 | -5,8 |
| 396 | Not classified | 3037919 | Bisthiosemi | -5,4 | -5,6 |
| 397 | Not classified | 3482402 | 4-(Dichloroacetyl)-1-oxa-4-azaspiro[4,5]decane | -6,4 | -5,6 |
| 398 | Not classified | 35970 | Thiocyclam | -4,3 | -2,9 |
| 399 | Not classified | 3776 | Isopropanol | -3,1 | -3,3 |
| 400 | Not classified | 38839 | Methoxyphenone | -7,8 | -7,4 |
| 401 | Not classified | 40818 | Ethylene Glycol Dinitrate | -4,7 | -4,7 |
| 402 | Not classified | 4131668 | Mefenpyr | -7,3 | -6,5 |
| 403 | Not classified | 41385 | Dimethipin | -6.0 | -4,6 |
| 404 | Not classified | 41462 | Buthidazole | -7,3 | -6,0 |
| 405 | Not classified | 4284 | N,N-Diethyl-m-toluamide | -6,3 | -6,0 |
| 406 | Not classified | 43079 | Fluridone | -9,4 | -8,1 |
| 407 | Not classified | 43704 | Nitrothal-isopropyl | -7,5 | -7,0 |
| 408 | Not classified | 442014 | Clerodin | -7,5 | -6,1 |
| 409 | Not classified | 44409094 | CLASFMUIFVKHQI-UHFFFAOYSA-N | -7,9 | -6,8 |
| 410 | Not classified | 44465 | Bromethalin | -7,9 | -5,7 |
| 411 | Not classified | 444972 | Fumaric Acid | -4,5 | -4,7 |
| 412 | Not classified | 4578030 | Diofenolan | -8,5 | -7,7 |
| 413 | Not classified | 46220487 | QEUOHPLVFSQWME-CYVLTUHYSA-N | -8,7 | -6,9 |
| 414 | Not classified | 50367 | Buprofezin | -7,0 | -6,4 |
| 415 | Not classified | 5236877 | FPKXBFWMIYHCID-UHFFFAOYSA-N | -7,3 | -5,9 |
| 416 | Not classified | 525 | Malic Acid | -4,7 | -5,0 |
| 417 | Not classified | 5280793 | Ergocalciferol | -9,2 | -7,0 |
| 418 | Not classified | 5281875 | Hydramethylnon | -11,7 | -8,9 |
| 419 | Not classified | 5338 | Sulfaquinoxaline | -8,4 | -7,1 |
| 420 | Not classified | 5372477 | Hydroprene | -6,1 | -6,3 |
| 421 | Not classified | 53858 | ACETONITRILE, ((1-(p-FLUOROBENZYL)-2-METHYL-4-NITRO-1H-IMIDAZOL-5-YL)THIO)- | -7,3 | -6,3 |
| 422 | Not classified | 54589430 | Afidopyropen | -9,6 | -7,6 |
| 423 | Not classified | 5614 | Malonoben | -7,0 | -5,3 |
| 424 | Not classified | 5796 | Sesamex | -6,5 | -6,1 |
| 425 | Not classified | 6049 | Ethylenediaminetetraacetic Acid | -6,0 | -5,6 |
| 426 | Not classified | 60976 | Metepa | -5,7 | -4,7 |
| 427 | Not classified | 6197 | Cycloheximide | -8,6 | -6,9 |
| 428 | Not classified | 62210 | Flumetralin | -7,4 | -6,1 |
| 429 | Not classified | 62478 | Bis(Trichloromethyl) Sulfone | -4,7 | -3,2 |
| 430 | Not classified | 6423 | Chloropicrin | -4,0 | -3,3 |
| 431 | Not classified | 6450825 | Triarathene | -9,3 | -7,5 |
| 432 | Not classified | 6451155 | Isoxadifen-ethyl | -7,5 | -6,6 |
| 433 | Not classified | 65420 | Dikegulac | -7,7 | -6,2 |
| 434 | Not classified | 6544 | Isophorone | -5,8 | -4,9 |
| 435 | Not classified | 66161 | Methiotepa | -5,2 | -3,9 |
| 436 | Not classified | 6693 | 1,8-Naphthalic anhydride | -8,0 | -7,0 |
| 437 | Not classified | 67119441 | FMPFURNXXAKYNE-UHFFFAOYSA-N | -8,7 | -7,9 |
| 438 | Not classified | 6733 | Valone | -7,4 | -6,9 |
| 439 | Not classified | 68602 | Medetomidine | -7,0 | -6,2 |
| 440 | Not classified | 6885 | Phthalide | -5,7 | -5,5 |
| 441 | Not classified | 695679 | Tioxazafen | -7,3 | -6,9 |
| 442 | Not classified | 712 | Formaldehyde | -1,6 | -1,8 |
| 443 | Not classified | 7271 | 2,4,5-Trichlorophenol | -5,5 | -4,9 |
| 444 | Not classified | 7362 | Furfural | -4,1 | -4,1 |
| 445 | Not classified | 7452 | 1,3-Dinitrobenzene | -6,1 | -5,8 |
| 446 | Not classified | 7700 | Nonoxinol | -5,9 | -5,8 |
| 447 | Not classified | 7839 | 1,2-Dibromoethane | -2,5 | -2,5 |
| 448 | Not classified | 7845 | 1,3-Butadiene | -2,9 | -2,9 |
| 449 | Not classified | 7855 | Acrylonitrile | -2,9 | -3,3 |
| 450 | Not classified | 7870 | Hexylene Glycol | -4,5 | -4,7 |
| 451 | Not classified | 7944 | Bis(2-chloro-1-methylethyl) ether | -4,3 | -4,3 |
| 452 | Not classified | 7967 | Cyclohexanone | -4,3 | -4,5 |
| 453 | Not classified | 8017 | 2-Hydroxyethylhydrazine | -4,0 | -3,9 |
| 454 | Not classified | 80271 | Tri-o-tolylphosphine | -7,9 | -6,4 |
| 455 | Not classified | 8042 | Isopropyl Myristate | -5,8 | -5,3 |
| 456 | Not classified | 8133 | Ethylene Glycol Monobutyl Ether | -4,0 | -4,1 |
| 457 | Not classified | 8418 | Anthracene | -7,5 | -7,1 |
| 458 | Not classified | 8442 | Piperonyl Sulfoxide | -7,3 | -6,1 |
| 459 | Not classified | 86187 | Furilazole | -7,0 | -5,5 |
| 460 | Not classified | 87556584 | Epocholeone | -10,5 | -6,7 |
| 461 | Not classified | 89040 | Acetofenate | -7,2 | -5,7 |
| 462 | Not classified | 896 | Melatonin | -7,1 | -6,4 |
| 463 | Not classified | 911208 | Fluromidine | -6,8 | -6,8 |
| 464 | Not classified | 91665 | Pyroquilon | -7,2 | -6,3 |
| 465 | Not classified | 91677 | Flurochloridone | -7,7 | -6,9 |
| 466 | Not classified | 91694 | Fenpropidin | -7,9 | -6,7 |
| 467 | Not classified | 91715 | Flurazole | -7,6 | -6,5 |
| 468 | Not classified | 91753 | Pyriproxyfen | -9,0 | -7,7 |
| 469 | Not classified | 92365 | Cyometrinil | -6,0 | -6,0 |
| 470 | Not classified | 92396 | Tetcyclacis | -8,2 | -6,8 |
| 471 | Not classified | 92401 | Inabenfide | -8,8 | -8,6 |
| 472 | Not classified | 93341 | Diclomezine | -7,4 | -6,7 |
| 473 | Not classified | 93528 | Cloquintocet-mexyl | -7,4 | -6,8 |
| 474 | Not classified | 93536 | Fenchlorazole | -7,1 | -5,4 |
| 475 | Not classified | 9570071 | Aldicarb | -5,5 | -4,8 |
| 476 | Not classified | 9570826 | Heptopargil | -6,5 | -4,8 |
| 477 | Not classified | 9576081 | Concep II | -6,6 | -6,6 |
| 478 | Not classified | 275182 | Berbamine | -9,6 | -8,0 |
| 479 | Not classified | 9864 | Cyanamide | -2,4 | -2,4 |
| 479 | Not classified | 9948894 | Pyriftalid | -8,0 | -7,1 |
| 480 | Organochlorine | 10522 | Chlorobenzilate | -7,3 | -6,6 |
| 481 | Organochlorine | 11954021 | Synklor | -6,9 | -5,4 |
| 482 | Organochlorine | 12309465 | RDYMFSUJUZBWLH-IOPZMNTHSA-N | -7,1 | -5,2 |
| 483 | Organochlorine | 12310947 | Aldrin | -7,0 | -5,0 |
| 484 | Organochlorine | 12358480 | Hexadrin | -7,2 | -4,9 |
| 485 | Organochlorine | 15583 | Bromocyclen | -5,6 | -4,0 |
| 486 | Organochlorine | 16686 | Dienochlor | -6,3 | -5,0 |
| 487 | Organochlorine | 16945 | Mirex | -6,1 | -4,3 |
| 488 | Organochlorine | 20226 | Kelevan | -7,2 | -6,4 |
| 489 | Organochlorine | 22833294 | Terpene Polychlorinates | -6,1 | -4,3 |
| 490 | Organochlorine | 2707 | Chloral Hydrate | -4,4 | -3,7 |
| 491 | Organochlorine | 299 | Chlordecone | -6,3 | -5,3 |
| 492 | Organochlorine | 3036 | p,p'-DDT | -8,0 | -6,6 |
| 493 | Organochlorine | 3224 | Endosulfan | -6,8 | -4,8 |
| 494 | Organochlorine | 3589 | Heptachlor | -6,4 | -4,5 |
| 495 | Organochlorine | 4115 | Methoxychlor | -7,9 | -6,0 |
| 496 | Organochlorine | 51556 | Fomesafen | -9,1 | -8,2 |
| 497 | Organochlorine | 5943 | Carbon Tetrachloride | -3,1 | -2,5 |
| 498 | Organochlorine | 62773 | Heptenophos | -6,2 | -5,9 |
| 499 | Organochlorine | 6294 | p,p'-DDD | -7,6 | -6,6 |
| 500 | Organochlorine | 6295 | Ethylan | -8,0 | -6,7 |
| 501 | Organochlorine | 6418 | Dalapon | -4,0 | -3,7 |
| 502 | Organochlorine | 6636 | Fenson | -7,4 | -6,1 |
| 503 | Organochlorine | 727 | Lindane | -5,9 | -4,4 |
| 504 | Organochlorine | 7639 | Chlorbenside | -6,8 | -6,4 |
| 505 | Organochlorine | 7835 | Epichlorohydrin | -2,8 | -3,3 |
| 506 | Organochlorine | 8268 | Dicofol | -7,6 | -7,0 |
| 507 | Organochlorine | 992 | Pentachlorophenol | -6,3 | -5,1 |
| 508 | Organofosforado | 1982 | Acephate | -4,9 | -4,6 |
| 509 | Organophosphate | 12541 | Thiometon | -4,4 | -3,9 |
| 510 | Organophosphate | 127394 | Isofenphos-methyl | -6,5 | -6,4 |
| 511 | Organophosphate | 12901 | Phosmet | -6,6 | -6,3 |
| 512 | Organophosphate | 12907347 | Isamidofos | -6,9 | -5,6 |
| 513 | Organophosphate | 13081 | Carbophenothion | -6,0 | -4,9 |
| 514 | Organophosphate | 13346 | Demeton-O-methyl | -4,7 | -4,1 |
| 515 | Organophosphate | 13526 | Demeton-S-methyl | -4,9 | -4,1 |
| 516 | Organophosphate | 13676 | Fonofos | -5,4 | -4,8 |
| 517 | Organophosphate | 13689 | Phosfolan | -5,5 | -4,5 |
| 518 | Organophosphate | 13707 | Mephosfolan | -5,8 | -4,7 |
| 519 | Organophosphate | 13709 | Methidathion | -5,6 | -5,4 |
| 520 | Organophosphate | 13943 | Triamiphos | -6,9 | -6,1 |
| 521 | Organophosphate | 14210 | Omethoate | -5,4 | -4,8 |
| 522 | Organophosphate | 15643 | Diamidafos | -6,3 | -5,8 |
| 523 | Organophosphate | 161967 | Trifenofos | -6,4 | -5,5 |
| 524 | Organophosphate | 16421 | EPN | -7,5 | -6,5 |
| 525 | Organophosphate | 16422 | Bromophos | -6,3 | -5,2 |
| 526 | Organophosphate | 16773 | Phenkapton | -6,2 | -4,8 |
| 527 | Organophosphate | 16774 | Prothoate | -5,3 | -4,8 |
| 528 | Organophosphate | 17242 | Oxydisulfoton | -5,0 | -4,4 |
| 529 | Organophosphate | 17345 | Formothion | -5,5 | -4,7 |
| 530 | Organophosphate | 17434 | Mecarbam | -5,8 | -5,0 |
| 531 | Organophosphate | 17435 | Phenthoate | -6,2 | -5,4 |
| 532 | Organophosphate | 17522 | Cyanophos | -5,6 | -5,4 |
| 533 | Organophosphate | 17580 | Lythidathion | -5,8 | -5,8 |
| 534 | Organophosphate | 17717 | Endothion | -6,0 | -5,4 |
| 535 | Organophosphate | 185020 | Butathiofos | -6,2 | -5,0 |
| 536 | Organophosphate | 19395 | Sulfotep | -5,4 | -4,2 |
| 537 | Organophosphate | 19577 | Fenthion Sulfoxide | -6,3 | -5,7 |
| 538 | Organophosphate | 19657 | Dioxabenzofos | -6,4 | -5,3 |
| 539 | Organophosphate | 201362 | Phosnichlor | -6,2 | -5,3 |
| 540 | Organophosphate | 20965 | Bromophos-ethyl | -6,2 | -5,2 |
| 541 | Organophosphate | 21207 | Ditalimfos | -7,1 | -6,9 |
| 542 | Organophosphate | 21803 | Chlorpyrifos-methyl | -6,4 | -5,2 |
| 543 | Organophosphate | 21805 | Fospirate | -6,5 | -5,4 |
| 544 | Organophosphate | 22083 | Aphidan | -5,6 | -4,3 |
| 545 | Organophosphate | 23717 | Propaphos | -6,1 | -5,2 |
| 546 | Organophosphate | 25146 | Dialifor | -7,0 | -6,2 |
| 547 | Organophosphate | 25670 | Terbufos | -5,1 | -4,0 |
| 548 | Organophosphate | 25815 | Amiphos | -4,9 | -4,1 |
| 549 | Organophosphate | 26124 | Quinalphos | -6,9 | -6,0 |
| 550 | Organophosphate | 2730 | Chlorpyrifos | -6,3 | -5,3 |
| 551 | Organophosphate | 28213 | Demeton-S-methylsulphon | -4,9 | -4,4 |
| 552 | Organophosphate | 28292 | Edifenphos | -6,2 | -5,6 |
| 553 | Organophosphate | 28935 | Jodfenphos | -5,8 | -5,3 |
| 554 | Organophosphate | 29307 | Isoxathion | -7,1 | -6,3 |
| 555 | Organophosphate | 3017 | Diazinon | -6,5 | -5,7 |
| 556 | Organophosphate | 3032604 | PHOSPHAMIDON | -5,7 | -4,4 |
| 557 | Organophosphate | 3034435 | Methacrifos | -5,6 | -4,9 |
| 558 | Organophosphate | 3034798 | Etaphos | -6,1 | -5,4 |
| 559 | Organophosphate | 3039 | Dichlorvos | -4,9 | -4,7 |
| 560 | Organophosphate | 30684 | Fosthietan | -5,2 | -4,5 |
| 561 | Organophosphate | 30709 | Leptophos | -7,0 | -6,0 |
| 562 | Organophosphate | 30772 | Inezin | -7,4 | -6,7 |
| 563 | Organophosphate | 3082 | Dimethoate | -5,3 | -4,3 |
| 564 | Organophosphate | 30859 | Chlorthiophos | -6,3 | -5,4 |
| 565 | Organophosphate | 31070 | Fenamiphos | -6,8 | -5,7 |
| 566 | Organophosphate | 3118 | Disulfoton | -4,7 | -4,1 |
| 567 | Organophosphate | 31200 | Fenitrothion | -6,4 | -5,7 |
| 568 | Organophosphate | 31343 | Butonate | -6,2 | -4,4 |
| 569 | Organophosphate | 31957 | Pirimiphos-ethyl | -6,2 | -5,9 |
| 570 | Organophosphate | 32184 | Triazophos | -7,0 | -6,1 |
| 571 | Organophosphate | 32230 | Piperophos | -6,4 | -5,0 |
| 572 | Organophosphate | 32739 | Chlormephos | -4,4 | -3,6 |
| 573 | Organophosphate | 3286 | Ethion | -4,9 | -4,3 |
| 574 | Organophosphate | 32872 | Isofenphos | -7,0 | -6,2 |
| 575 | Organophosphate | 3289 | Ethoprop | -4,8 | -4,1 |
| 576 | Organophosphate | 33257 | Fosamine | -4,9 | -5,0 |
| 577 | Organophosphate | 33294 | Iprobenfos | -6,5 | -5,8 |
| 578 | Organophosphate | 3346 | Fenthion | -5,9 | -5,3 |
| 579 | Organophosphate | 34488 | Mecarphon | -5,5 | -4,9 |
| 580 | Organophosphate | 34526 | Pirimiphos-methyl | -6,3 | -5,7 |
| 581 | Organophosphate | 36870 | Prothiofos | -6,0 | -5,2 |
| 582 | Organophosphate | 37125 | Sulprofos | -5,8 | -5,1 |
| 583 | Organophosphate | 37419 | Butamifos | -6,3 | -5,4 |
| 584 | Organophosphate | 37490 | Isothioate | -4,5 | -4,1 |
| 585 | Organophosphate | 37995 | Etrimfos | -6,3 | -5,1 |
| 586 | Organophosphate | 38779 | Profenofos | -6,4 | -5,3 |
| 587 | Organophosphate | 39223 | Isazofos | -6,3 | -4,9 |
| 588 | Organophosphate | 4004 | Malathion | -5,4 | -4,5 |
| 589 | Organophosphate | 4096 | Methamidophos | -3,8 | -4,1 |
| 590 | Organophosphate | 4130 | Methyl Parathion | -6,5 | -5,6 |
| 591 | Organophosphate | 4420 | Naled | -5,4 | -4,1 |
| 592 | Organophosphate | 4618 | Oxydemeton-methyl | -4,7 | -4,6 |
| 593 | Organophosphate | 4790 | Phorate | -4,5 | -4,1 |
| 594 | Organophosphate | 4793 | Phosalone | -6,8 | -5,4 |
| 595 | Organophosphate | 4794 | Glufosinate | -5,3 | -5,9 |
| 596 | Organophosphate | 5125 | Tribufos | -5,2 | -4,4 |
| 597 | Organophosphate | 5284462 | Gardona | -6,6 | -5,5 |
| 598 | Organophosphate | 53242358 | 1-(Dimethoxyphosphoryl)ethyl (2,4-dichlorophenoxy)acetate | -6,8 | -5,6 |
| 599 | Organophosphate | 5371560 | Dicrotophos | -5,7 | -4,5 |
| 600 | Organophosphate | 5371562 | Monocrotophos | -6,2 | -5,1 |
| 601 | Organophosphate | 5372405 | Propetamphos | -6,0 | -5,4 |
| 602 | Organophosphate | 5377784 | Clofenvinfos | -6,7 | -5,7 |
| 603 | Organophosphate | 5392 | Temephos | -7,9 | -5,7 |
| 604 | Organophosphate | 55138 | Fosmethilan | -6,8 | -5,3 |
| 605 | Organophosphate | 560193 | Vamidothion | -5,4 | -4,8 |
| 606 | Organophosphate | 5853 | Trichlorfon | -5,3 | -4,9 |
| 607 | Organophosphate | 6108489 | Bromfenvinphos | -6,6 | -5,5 |
| 608 | Organophosphate | 6328134 | Phosphonic Acid, Monoethyl Ester | -3,7 | -3,7 |
| 609 | Organophosphate | 6433329 | Dimethylvinphos | -6,7 | -5,5 |
| 610 | Organophosphate | 6438039 | Methocrotophos | -5,7 | -4,6 |
| 611 | Organophosphate | 6451756 | Hexylthiofos | -5,8 | -4,9 |
| 612 | Organophosphate | 6531 | Dioxathion | -5,8 | -4,8 |
| 613 | Organophosphate | 6543 | Menazon | -5,9 | -5,3 |
| 614 | Organophosphate | 71482 | Azamethiphos | -6,8 | -5,6 |
| 615 | Organophosphate | 72069 | Quintiofos | -8,5 | -7,1 |
| 616 | Organophosphate | 7328 | Dichlofenthion | -6,2 | -5,3 |
| 617 | Organophosphate | 77322 | Cyanthoate | -6,0 | -5,1 |
| 618 | Organophosphate | 7873 | Tetraethyl Pyrophosphate | -5,4 | -4,7 |
| 619 | Organophosphate | 79914 | Azothoate | -7,6 | -5,9 |
| 620 | Organophosphate | 8264 | Dimefox | -4,5 | -3,9 |
| 621 | Organophosphate | 8292 | Fensulfothion | -5,9 | -5,6 |
| 622 | Organophosphate | 8381 | Pyridaphenthion | -7,9 | -6,2 |
| 623 | Organophosphate | 8952 | Morphothion | -5,6 | -5,0 |
| 624 | Organophosphate | 9011 | Merphos | -5,1 | -4,1 |
| 625 | Organophosphate | 9037 | Schradan | -5,3 | -4,0 |
| 626 | Organophosphate | 90479 | Isocarbophos | -6,9 | -5,4 |
| 627 | Organophosphate | 91523 | Oxydeprofos | -5,1 | -4,6 |
| 628 | Organophosphate | 91529 | Isomalathion | -5,4 | -4,6 |
| 629 | Organophosphate | 91655 | Chlorethoxyfos | -5,4 | -4,2 |
| 630 | Organophosphate | 91687 | Anilofos | -6,8 | -6,0 |
| 631 | Organophosphate | 91752 | Cadusafos | -5,5 | -4,3 |
| 632 | Organophosphate | 91758 | Fosthiazate | -5,8 | -4,6 |
| 633 | Organophosphate | 9272 | Thionazin | -5,8 | -4,5 |
| 634 | Organophosphate | 9298 | Fenchlorphos | -6,5 | -5,2 |
| 635 | Organophosphate | 93460 | Pyraclofos | -7,1 | -5,8 |
| 636 | Organophosphate | 93516 | Tebupirimfos | -6,7 | -5,6 |
| 637 | Organophosphate | 9477 | Trichloronate | -6,5 | -5,0 |
| 638 | Organophosphate | 9570168 | Phosacetim | -6,9 | -6,8 |
| 639 | Organophosphate | 9570290 | Baythion | -6,6 | -6,0 |
| 640 | Organophosphate | 9570291 | Chlorphoxim | -6,8 | -5,9 |
| 641 | Organophosphate | 991 | Parathion | -6,0 | -5,5 |
| 642 | Organophosphateracemicmixture | 5355863 | Mevinphos | -5,7 | -5,1 |
| 643 | Organophosphorus | 92304 | Phosdiphen | -7,7 | -6,6 |
| 644 | Oxadiazolone | 43365 | Metoxadiazone | -6,7 | -6,8 |
| 645 | Oxadiazolone | 4690 | Methazole | -7,0 | -6,2 |
| 646 | Oxathiin | 21330 | Oxycarboxin | -7,7 | -6,4 |
| 647 | Oxathiin | 47898 | Flutolanil | -9,1 | -7,4 |
| 647 | Oxazole | 213032 | Famoxadone | -9,8 | -8,1 |
| 648 | Oxazole | 15452203 | Isoxachlortole | -7,6 | -6,1 |
| 649 | Oxazole | 213032 | Famoxadone | -9,8 | -8,1 |
| 650 | Oxazole | 24781 | Hymexazol | -4,3 | -4,5 |
| 651 | Oxazole | 39676 | Vinclozolin | -7,6 | -6,6 |
| 652 | Oxazole | 41648 | Isouron | -6,8 | -5,7 |
| 653 | Oxazole | 53235546 | ACDZDIIWZVQMIX-UHFFFAOYSA-N | -7,5 | -6,1 |
| 654 | Oxazole | 71300861 | Pyrisoxazole | -8,5 | -7,1 |
| 655 | Oxazole | 9570206 | AC1NC0CJ | -7,4 | -6,3 |
| 657 | Oxazolidin | 51574 | Chlozolinate | -7,9 | -6,5 |
| 658 | Oxidiazole | 29732 | Oxadiazon | -8,0 | -6,5 |
| 659 | Oxidiazole | 94498 | Oxadiargyl | -7,8 | -6,2 |
| 660 | Oximeether | 91747 | Fluxofenim | -7,7 | -6,8 |
| 661 | Oxiranecompound | 73669 | Tridiphane | -6,5 | -6,1 |
| 662 | Oxyacetamide | 84098 | Isoxaflutole | -8,1 | -7,0 |
| 663 | Oxyacetamide | 86429 | Flufenacet | -8,6 | -7,4 |
| 664 | Oxyacetamide | 91716 | Mefenacet | -8,0 | -7,8 |
| 665 | Phenol | 3598 | Hexachlorophene | -6,9 | -6,7 |
| 666 | Phenol | 7017 | 2-Phenylphenol | -6,7 | -6,8 |
| 667 | Phenol | 785 | Hydroquinone | -4,8 | -4,7 |
| 668 | Phenoxipropionicacid | 6440577 | Difenopenten-ethyl | -8,6 | -8,0 |
| 669 | Phenoxipropionicacid | 7158 | Silvex | -6,6 | -6,0 |
| 670 | Phenoxyacid | 12761569 | Trifopsime | -8,9 | -8,0 |
| 671 | Phenoxyacid | 8686 | Erbon | -6,7 | -5,5 |
| 672 | Phenoxyacid | 93482 | Clomeprop | -8,3 | -7,4 |
| 673 | Phenoxypropionic | 86866 | Fenoprop-butotyl | -6,8 | -6,3 |
| 674 | Phenylamide | 42586 | Metalaxyl | -5,9 | -4,5 |
| 675 | Phenylamide | 42850 | Ofurace | -6,3 | -5,1 |
| 676 | Phenylamide | 53735 | Oxadixyl | -6,0 | -5,6 |
| 677 | Phenylfuranone | 6538287 | Difunon | -7,5 | -5,5 |
| 678 | Phenylpyraole | 15672202 | Pyraflufen | -7,8 | -7,0 |
| 679 | Phenylpyraole | 182951 | Pyraflufen-ethyl | -7,8 | -6,9 |
| 680 | Phenylpyrazole | 3083545 | Fluazolate | -8,9 | -7,2 |
| 681 | Phenylpyrazole | 3352 | Fipronil | -7,4 | -6,0 |
| 682 | Phenylpyrazole | 56841657 | Flufiprole | -7,7 | -5,9 |
| 683 | Phenylpyrazole | 9930667 | Ethiprole | -7,2 | -5,7 |
| 684 | Phenylpyridinamine | 91731 | Fluazinam | -8,0 | -7,6 |
| 685 | Phenylpyrrole | 86398 | Fludioxonil | -8,0 | -6,7 |
| 686 | Phenylpyrrole | 91724 | Fenpiclonil | -6,8 | -5,5 |
| 687 | Phenylurea | 14152665 | Metobenzuron | -9,6 | -8,0 |
| 688 | Phenylurea | 16116 | Siduron | -8,1 | -5,8 |
| 689 | Phenylurea | 16562 | Fluometuron | -7,5 | -6,4 |
| 690 | Phenylurea | 19587 | Buturon | -6,9 | -5,7 |
| 691 | Phenylurea | 19834572 | Chloreturon | -6,5 | -5,5 |
| 692 | Phenylurea | 26576 | Difenoxuron | -7,9 | -7,0 |
| 693 | Phenylurea | 3014120 | Anisuron | -7,6 | -6,2 |
| 694 | Phenylurea | 3120 | Diuron | -6,6 | -5,6 |
| 695 | Phenylurea | 36478 | Fluothiuron | -6,8 | -6,0 |
| 696 | Phenylurea | 40087 | Thidiazuron | -6,7 | -5,9 |
| 697 | Phenylurea | 8800 | Monuron | -6,3 | -5,4 |
| 698 | Phenylurea | 91612 | Dimefuron | -8,3 | -6,3 |
| 699 | Phenylurea | 91692 | Pencycuron | -8,7 | -7,4 |
| 700 | Phenylurea | 92326 | Methyldymron | -8,0 | -6,9 |
| 701 | Phenylurea | 93379 | Forchlorfenuron | -7,5 | -6,4 |
| 702 | Pheromone | 8209 | 1-Tetradecanol | -5,3 | -4,8 |
| 703 | Phosphonoglycine | 3496 | Glyphosate | -5,2 | -5,4 |
| 704 | Phosphonothioate | 18772487 | Imicyafos | -6,1 | -5,1 |
| 705 | Phosphonothioate | 26033 | Pyrazophos | -7,0 | -6,6 |
| 706 | Phosphonothioate | 39681 | Isoprothiolane | -5,8 | -5,0 |
| 707 | Phosphorodiamide | 12600723 | Mazidox | -5,0 | -4,5 |
| 708 | Phosphorodiamide | 9738 | Mipafox | -5,3 | -5,2 |
| 709 | Phosphorodithioate | 12932 | Bensulide | -6,8 | -5,7 |
| 710 | Phthalamate | 8594 | Naptalam | -9,1 | -7,9 |
| 711 | Phthalimide | 17038 | Captafol | -7,0 | -6,4 |
| 712 | Phthalimide | 8606 | Captan | -7,0 | -6,3 |
| 713 | Phthalimide | 8607 | Folpet | -7,1 | -6,2 |
| 714 | phyrethroids | 161852 | 3-(4-Hydroxyphenoxy)benzoic acid | -7,8 | -6,8 |
| 715 | phyrethroids | 162381 | Bioresmethrin | -9,1 | -8,1 |
| 716 | phyrethroids | 36819 | Methothrin | -7,9 | -6,7 |
| 717 | phyrethroids | 5053 | Resmethrin | -9,1 | -8,1 |
| 718 | Picolinicacid | 16656802 | Halauxifen-methyl | -8,0 | -6,4 |
| 719 | Picolinicacid | 25181547 | Halauxifen | -8,2 | -6,4 |
| 720 | Piperazine | 33565 | Triforine | -6,7 | -5,0 |
| 721 | Piperidine | 125098 | Icaridin | -6,5 | -5,7 |
| 722 | Piperidinylthiazoleisoxazoline | 56945145 | Oxathiapiprolin | -11,3 | -9,5 |
| 723 | Piridina | 1727 | 4-Aminopyridine | -4,1 | -4,0 |
| 724 | Plantandinsectderived | 8193 | 1-Dodecanol | -5,0 | -4,7 |
| 725 | Plantderived | 412 | Nornicotine | -5,9 | -5,8 |
| 726 | Polyhydroxysteroid | 115196 | Brassinolide | -10,5 | -6,9 |
| 727 | Polymer | 6579 | Acrylamide | -3,6 | -3,6 |
| 728 | Polysaccharide | 439586 | Amylotriose | -7,1 | -6,3 |
| 729 | Pryimidinamine | 10813 | Crimidine | -5,6 | -5,2 |
| 730 | Pyrazole | 11688533 | Sedaxane | -8,5 | -7,8 |
| 731 | Pyrazole | 25271089 | Isopyrazam | -8,9 | -7,4 |
| 732 | Pyrazole | 73777241 | Pyflubumide | -7,3 | -5,7 |
| 733 | Pyrazolium | 11674113 | Penflufen | -7,6 | -6,8 |
| 734 | Pyrazolium | 16095400 | Fluxapyroxad | -8,7 | -8,4 |
| 735 | Pyrazolium | 3083543 | Furametpyr | -8,8 | -6,8 |
| 736 | Pyrazolium | 3416953 | 1H-Pyrazol-2-ium | -3,7 | -3,9 |
| 737 | Pyrazolium | 39425 | Difenzoquat | -8,3 | -6,5 |
| 738 | Pyrazolium | 86354 | Tebufenpyrad | -8,0 | -6,8 |
| 739 | Pyrazolium | 91763 | Halosulfuron-methyl | -8,2 | -7,1 |
| 740 | Pyrazolium | 92383 | Pyrazoxyfen | -8,5 | -8,0 |
| 741 | Pyrazolium | 9576412 | Fenpyroximate | -9,3 | -8,1 |
| 743 | Pyrethroid | 123622 | Imiprothrin | -8,4 | -7,0 |
| 744 | Pyrethroid | 12617362 | zeta-Cypermethrin | -9,1 | -8,3 |
| 745 | Pyrethroid | 12940701 | UGWALRUNBSBTGI-ZKMZRDRYSA-N | -9,3 | -8,2 |
| 746 | Pyrethroid | 15118048 | Cyhalofop | -8,3 | -7,0 |
| 747 | Pyrethroid | 162381 | Bioresmethrin | -9,1 | -8,1 |
| 748 | Pyrethroid | 16722122 | Brofluthrinate | -8,8 | -8,6 |
| 749 | Pyrethroid | 213011 | Dimefluthrin | -8,7 | -6,9 |
| 750 | Pyrethroid | 25193220 | Momfluorothrin, (Z)- | -8,6 | -7,1 |
| 751 | Pyrethroid | 27409 | Terallethrin | -7,3 | -6,3 |
| 752 | Pyrethroid | 28248 | Furethrin | -8,6 | -7,0 |
| 753 | Pyrethroid | 2912 | Cypermethrin | -9,0 | -8,3 |
| 754 | Pyrethroid | 3347 | Fenvalerate | -8,8 | -8,2 |
| 755 | Pyrethroid | 38283 | Cyphenothrin | -8,6 | -8,5 |
| 756 | Pyrethroid | 40326 | Permethrin | -9,3 | -8,6 |
| 757 | Pyrethroid | 40585 | Deltamethrin | -8,8 | -8,1 |
| 758 | Pyrethroid | 43859 | trans-Permethrin | -9,4 | -8,5 |
| 759 | Pyrethroid | 47326 | Fenpropathrin | -9,0 | -7,8 |
| 760 | Pyrethroid | 4767 | Phenothrin | -9,4 | -8,6 |
| 761 | Pyrethroid | 48132 | Tralomethrin | -8,7 | -7,2 |
| 762 | Pyrethroid | 50210 | Fenpirithrin | -8,3 | -8,1 |
| 763 | Pyrethroid | 5053 | Resmethrin | -9,1 | -8,1 |
| 764 | Pyrethroid | 50980 | Flucythrinate | -9,3 | -8,4 |
| 765 | Pyrethroid | 5281872 | Bifenthrin | -8,1 | -7,6 |
| 766 | Pyrethroid | 5281873 | Cyhalothrin | -9,6 | -8,4 |
| 767 | Pyrethroid | 6265 | Dimethrin | -8,2 | -7,1 |
| 768 | Pyrethroid | 6434488 | Empenthrin | -7,0 | -6,0 |
| 769 | Pyrethroid | 6436606 | Acrinathrin [ISO] | -9,3 | -8,6 |
| 770 | Pyrethroid | 6440554 | gamma-Cyhalothrin | -9,7 | -8,9 |
| 771 | Pyrethroid | 6442842 | Biphenthrin | -8,5 | -7,3 |
| 772 | Pyrethroid | 6451141 | Protrifenbute | -9,3 | -8,9 |
| 773 | Pyrethroid | 6455515 | Fenfluthrin | -8,8 | -7,3 |
| 774 | Pyrethroid | 656612 | Transfluthrin | -8,2 | -7,0 |
| 775 | Pyrethroid | 71245 | Etofenprox | -8,6 | -8,0 |
| 776 | Pyrethroid | 7325 | Cyclethrin | -8,3 | -7,4 |
| 777 | Pyrethroid | 83975 | Tetramethrin | -8,6 | -7,8 |
| 778 | Pyrethroid | 86103 | Flufenprox | -8,7 | -8,7 |
| 779 | Pyrethroid | 90284302 | Heptafluthrin | -8,7 | -8,3 |
| 780 | Pyrethroid | 91686 | Cycloprothrin | -9,4 | -8,1 |
| 781 | Pyrethroidester | 163130 | Tralocythrin | -9,0 | -7,4 |
| 782 | Pyrethroidester | 5282227 | Metofluthrin | -8,5 | -6,9 |
| 783 | Pyrethroidester | 56841697 | Meperfluthrin | -8,3 | -6,9 |
| 784 | Pyridalyl | 94459 | 1-(2-Pyridyl)piperazine | -6,1 | -5,9 |
| 785 | Pyridazine | 21954 | Maleic Hydrazide | -5,1 | -5,3 |
| 786 | Pyridazine | 23013854 | Cyclopyrimorate | -8,6 | -7,6 |
| 787 | Pyridazine | 26715 | Pyridazine, 3-(2-methylphenoxy)- | -6,8 | -6,2 |
| 788 | Pyridazinone | 12785740 | Pydanon | -7,0 | -6,3 |
| 789 | Pyridazinone | 15546 | Chloridazon | -7,0 | -5,9 |
| 790 | Pyridazinone | 3038525 | Neflamapimod | -9,7 | -8,2 |
| 791 | Pyridazinone | 3081924 | Oxapyrazon | -8,3 | -6,8 |
| 792 | Pyridazinone | 3083546 | Flufenpyr-ethyl | -8,1 | -7,5 |
| 793 | Pyridazinone | 33775 | Norflurazon | -8,0 | -6,8 |
| 794 | Pyridazinone | 76441 | Brompyrazon | -6,9 | -6,0 |
| 795 | Pyridazinone | 768265 | Dimidazon | -6,9 | -6,4 |
| 796 | Pyridazinone | 91755 | Flurtamone | -9,2 | -8,3 |
| 797 | Pyridine | 14146 | Pyridinitril | -6,2 | -5,4 |
| 798 | Pyridine | 15965 | Picloram | -6,5 | -5,5 |
| 799 | Pyridine | 19834537 | Cliodinate | -5,8 | -4,3 |
| 800 | Pyridine | 3109 | Dipyrithione | -6,7 | -6,0 |
| 801 | Pyridine | 39978 | Buthiobate | -7,9 | -6,3 |
| 802 | Pyridine | 41428 | Triclopyr | -6,2 | -5,7 |
| 803 | Pyridine | 47455 | Triclopyr-butotyl | -6,5 | -5,9 |
| 804 | Pyridine | 50465 | Fluroxypyr | -6,8 | -6,1 |
| 805 | Pyridine | 54745 | Fluroxypyr-meptyl | -7,5 | -6,5 |
| 806 | Pyridine | 6023583 | Pyrifenox | -7,4 | -6,0 |
| 807 | Pyridine | 67420724 | Florpyrauxifen | -8,2 | -6,3 |
| 808 | Pyridine | 6920223 | Picolinate | -5,2 | -5,0 |
| 809 | Pyridine | 70495450 | Florpyrauxifen-Benzyl | -8,9 | -8,6 |
| 810 | Pyridine | 75902 | Haloxydine | -6,0 | -4,9 |
| 811 | Pyridine | 91757 | Dithiopyr | -7,0 | -5,9 |
| 812 | Pyridine | 91776 | Thiazopyr | -7,0 | -6,4 |
| 813 | Pyridine | 9576037 | Pymetrozine | -7,6 | -6,3 |
| 814 | Pyridine | 9834513 | Flonicamid | -6,6 | -5,8 |
| 815 | Pyrimidinamine | 11079009 | Flufenerim | -7,8 | -7,5 |
| 816 | Pyrimidine | 15390131 | Diflumetorim | -7,9 | -6,7 |
| 817 | Pyrimidine | 43226 | Fenarimol | -7,9 | -6,8 |
| 818 | Pyrimidine | 77338 | 4,6-Dichloro-2-phenylpyrimidine | -7,0 | -6,2 |
| 819 | Pyrimidine | 91683 | Nuarimol | -7,9 | -6,7 |
| 822 | Pyrimidinol | 38884 | Bupirimate | -7,0 | -5,9 |
| 823 | Pyrimidinylcarbinol | 73668 | Flurprimidol | -7,8 | -6,7 |
| 824 | Pyrimidinyloxybenzoic | 9604652 | Pyriminobac-methyl | -7,0 | -7,0 |
| 825 | Pyrimidinyloxybenzylamine | 12151362 | ZHYPDEKPSXOZKN-UHFFFAOYSA-N | -9,2 | -7,1 |
| 826 | Pyrimidinylsulfonylurea | 11990852 | Propyrisulfuron | -9,3 | -8,2 |
| 827 | Pyrimidinylsulfonylurea | 132910 | Flupyrsulfuron | -8,7 | -8,3 |
| 828 | Pyrrole | 90363 | N-(3,5-Dichlorophenyl)succinimide | -6,7 | -5,6 |
| 829 | Pyrrole | 91778 | Chlorfenapyr | -6,7 | -5,7 |
| 830 | Quarternaryammoniumcompound | 18743 | Mepiquat | -4,3 | -3,6 |
| 831 | Quarternaryammoniumcompound | 39484 | Cyperquat | -6,4 | -6,1 |
| 832 | Quarternaryammoniumcompound | 92514 | Piproctanyl | -6,4 | -5,1 |
| 833 | Quinazoline | 11842644 | Pyrifluquinazon | -10 | -8,9 |
| 834 | Quinazoline | 86356 | Fenazaquin | -8,7 | -7,6 |
| 835 | Quinolina | 1923 | 8-Quinolinol | -6,2 | -5,7 |
| 836 | Quinoline | 3293 | Ethoxyquin | -7,1 | -5,9 |
| 837 | Quinoline | 3293 | Ethoxyquin | -7,1 | -5,9 |
| 838 | Quinoline | 3391107 | Neuro_000445 | -8,7 | -7,5 |
| 839 | Quinoline | 91749 | Quinmerac | -7,2 | -6,6 |
| 840 | Quinoline | 91739 | Quinclorac | -7,2 | -6,4 |
| 841 | Quinone | 18771 | Dithianon | -7,1 | -6,6 |
| 842 | Quinone | 8342 | Dichlone | -7,1 | -6,4 |
| 843 | Quinone | 8371 | Chloranil | -6,2 | -4,8 |
| 844 | Quinoxaline | 10372 | Chlorthion | -6,4 | -5,7 |
| 845 | Quinoxaline | 7159 | Thioquinox | -6,8 | -5,9 |
| 846 | Saturatedfattyacid | 985 | Palmitic Acid | -5,8 | -5,3 |
| 847 | Semicarbazone | 6125184 | Diflufenzopyr | -8,1 | -6,7 |
| 848 | Sterol | 5280795 | Vitamin D3 | -8,6 | -6,9 |
| 849 | Strobilurin | 213016 | Trifloxystrobin | -8,6 | -8,1 |
| 850 | Strobilurin | 3034285 | Azoxystrobin | -8,6 | -7,3 |
| 851 | Strobilurin | 45380417 | Pyraoxystrobin | -8,8 | -7,4 |
| 852 | Strobilurin | 45380430 | Fenaminstrobin | -8,5 | -6,8 |
| 853 | Strobilurin | 45380432 | Coumoxystrobin | -8,9 | -7,1 |
| 854 | Strobilurin | 45381137 | Pyrametostrobin | -8,2 | -8,0 |
| 855 | Strobilurin | 5483872 | Metominostrobin | -7,6 | -6,1 |
| 856 | Strobilurin | 57582386 | Triclopyricarb | -7,6 | -6,3 |
| 857 | Strobilurin | 59774441 | Flufenoxystrobin | -8,3 | -7,2 |
| 858 | Strobilurin | 6112114 | Kresoxim-Methyl | -7,5 | -6,8 |
| 859 | Strobilurin | 6422843 | Pyraclostrobin | -8,2 | -7,6 |
| 860 | Strobilurin | 9954185 | Fluacrypyrim | -8,1 | -7,8 |
| 861 | Substituted | 17581 | Chloroneb | -5,4 | -4,8 |
| 862 | Sugar | 5780 | Sorbitol | -5,7 | -6,0 |
| 863 | Sugar | 753 | Glycerol | -3,8 | -4,1 |
| 864 | Sulfonamide | 10238657 | Amisulbrom | -8,5 | -8,2 |
| 865 | Sulfonanilide | 155115 | Benzofluor | -7,3 | -6,4 |
| 866 | Sulfonanilide | 16004663 | Triafamone | -7,4 | -6,1 |
| 867 | Sulfonanilide | 3081304 | Diclosulam | -8,6 | -6,5 |
| 868 | Sulfonanilide | 37869 | Perfluidone | -8,7 | -8,0 |
| 869 | Sulfonanilide | 86268 | Flusulfamide | -9,2 | -8,3 |
| 870 | Sulfonanilide | 86453 | Cloransulam-methyl | -9,1 | -6,5 |
| 871 | Sulfonylurea | 153909 | Tribenuron-methyl | -8,4 | -7,4 |
| 872 | Sulfonylurea | 170354 | Flupyrsulfuron-methyl | -8,8 | -7,6 |
| 873 | Sulfonylurea | 170356 | Flucetosulfuron | -8,0 | -6,7 |
| 874 | Sulfonylurea | 3623881 | Ethoxysulfuron | -8,5 | -7,2 |
| 875 | Sulfonylurea | 47491 | Chlorsulfuron | -8,5 | -8,4 |
| 876 | Sulfonylurea | 52997 | Sulfometuron Methyl | -8,2 | -7,9 |
| 877 | Sulfonylurea | 52999 | Metsulfuron-methyl | -8,3 | -7,9 |
| 878 | Sulfonylurea | 54960 | Bensulfuron-methyl | -8,5 | -7,2 |
| 879 | Sulfonylurea | 56160 | Chlorimuron-ethyl | -8,2 | -7,0 |
| 880 | Sulfonylurea | 57418258 | RWRAIUZGUDAXDR-UHFFFAOYSA-N | -8,2 | -7,6 |
| 881 | Sulfonylurea | 6451137 | Cyclosulfamuron | -8,8 | -7,7 |
| 882 | Sulfonylurea | 73281 | Nicosulfuron | -8,5 | -7,2 |
| 883 | Sulfonylurea | 73282 | Triasulfuron | -8,2 | -7,8 |
| 884 | Sulfonylurea | 73674 | Thifensulfuron-methyl | -8,9 | -7,1 |
| 885 | Sulfonylurea | 86416 | Triflusulfuron | -9,0 | -8,7 |
| 886 | Sulfonylurea | 86443 | Oxasulfuron | -8,4 | -7,8 |
| 887 | Sulfonylurea | 91729 | Thifensulfuron | -8,8 | -7,0 |
| 888 | Sulfonylurea | 91730 | Metsulfuron | -9,3 | -7,2 |
| 889 | Sulfonylurea | 91750 | Pyrazosulfuron-ethyl | -8,1 | -7,2 |
| 890 | Sulfonylurea | 91762 | Chlorimuron | -9,4 | -7,1 |
| 891 | Sulfonylurea | 91772 | Tribenuron | -8,8 | -7,4 |
| 892 | Sulfonylurea | 91774 | Primisulfuron | -8,8 | -8,8 |
| 893 | Sulfonylurea | 91779 | Rimsulfuron | -8,7 | -7,5 |
| 894 | Sulfonylurea | 92420 | Cinosulfuron | -7,9 | -7,6 |
| 895 | Sulfonylurea | 92433 | Imazosulfuron | -8,8 | -8,6 |
| 896 | Sulfonylurea | 92434 | Triflusulfuron-methyl | -8,5 | -8,6 |
| 897 | Sulfonylurea | 93539 | Flazasulfuron | -9,5 | -7,5 |
| 898 | Sulfonylurea | 9955886 | Trifloxysulfuron | -8,5 | -7,9 |
| 899 | Sulfosulfuron | 86426 | Sulfosulfuron | -8,1 | -8,3 |
| 900 | Sulfoximine | 16723172 | Sulfoxaflor | -6,8 | -5,9 |
| 901 | Sulphamide | 12898 | Tolylfluanid | -6,7 | -6,0 |
| 902 | Sulphamide | 14145 | Dichlofluanid | -6,3 | -5,8 |
| 903 | Sulphiteester | 4936 | Propargite | -7,4 | -6,9 |
| 904 | Syntheticjasmonate | 20056433 | Prohydrojasmon | -6,5 | -5,5 |
| 905 | Syntheticpyrethroid | 91768 | tau-Fluvalinate | -9,4 | -8,8 |
| 906 | Syntheticpyrethroid | 9839306 | Prallethrin | -7,7 | -6,7 |
| 907 | Tertiaryamides | 56841100 | Neodecanamide, N-methyl- | -5,7 | -4,8 |
| 908 | Tetramicacid | 9969573 | Spirotetramat | -7,5 | -5,6 |
| 909 | Tetrazine | 153985 | Diflovidazin | -8,6 | -7,6 |
| 910 | Tetrazine | 73670 | Clofentezine | -8,7 | -7,6 |
| 911 | Tetrazolinone | 3081363 | Fentrazamide | -8,6 | -7,0 |
| 912 | Tetronicacid | 177863 | Spirodiclofen | -8,2 | -6,4 |
| 913 | Tetronicacid | 9907412 | Spiromesifen | -7,8 | -5,6 |
| 914 | Thiadiazole | 3035829 | Bismerthiazol | -6,3 | -6,0 |
| 915 | Thiadiazolylurea | 121611 | Buthiuron | -7,1 | -5,9 |
| 916 | Thiadiazolylurea | 32921 | Thiazafluron | -6,8 | -6,4 |
| 917 | Thiadiazolylurea | 91596 | Ethidimuron | -6,7 | -5,8 |
| 918 | Thiazole | 11174640 | Ethaboxam | -7,2 | -6,0 |
| 919 | Thiazole | 17756624 | Dichlobentiazox | -8,3 | -6,9 |
| 920 | Thiazole | 9796266 | Isotianil | -7,4 | -6,4 |
| 921 | Thiazolidine | 44151818 | Flutianil | -7,7 | -6,4 |
| 922 | Thiazolidine | 6089962 | Cropotex | -9,1 | -7,8 |
| 923 | Thiocarbamate | 10404 | Dixanthogen | -4,6 | -4,3 |
| 924 | Thiocarbamate | 12968 | S-Ethyl dipropylthiocarbamate | -4,9 | -4,6 |
| 925 | Thiocarbamate | 14215 | Pebulate | -5,2 | -4,7 |
| 926 | Thiocarbamate | 14337 | Cycloate | -5,7 | -5,4 |
| 927 | Thiocarbamate | 15115 | Dimexano | -4,3 | -4,0 |
| 928 | Thiocarbamate | 16003 | Vernolate | -5,1 | -4,8 |
| 929 | Thiocarbamate | 16653 | Molinate | -6,0 | -5,5 |
| 930 | Thiocarbamate | 24915 | Butanoic acid, 1,1-dimethyl-2-phenylethyl ester | -6,5 | -5,6 |
| 931 | Thiocarbamate | 29697 | Prothiocarb | -4,9 | -4,4 |
| 932 | Thiocarbamate | 34192 | Thiobencarb | -6,1 | -5,6 |
| 933 | Thiocarbamate | 36867 | Orbencarb | -6,2 | -5,4 |
| 934 | Thiocarbamate | 37523 | Tiocarbazil | -6,8 | -5,4 |
| 935 | Thiocarbamate | 44178 | Fenothiocarb | -6,2 | -5,7 |
| 936 | Thiocarbamate | 5284376 | Diallate | -5,9 | -4,6 |
| 937 | Thiocarbamate | 7216 | Sulfallate | -4,9 | -4,1 |
| 938 | Thiocarbamate | 76585 | Isopolinate | -6,0 | -5,2 |
| 939 | Thiocarbamate | 91679 | Dimepiperate | -7,1 | -5,7 |
| 940 | Thiocarbamate | 91740 | Esprocarb | -6,5 | -5,8 |
| 941 | Thiocarbamate | 93362 | Methasulfocarb | -6,6 | -5,8 |
| 942 | Thiocarbamide | 2723790 | Thiourea | -2,9 | -3,1 |
| 943 | Thiolcompound | 6343 | Ethanethiol | -1,9 | -2,1 |
| 944 | Thiolcompound | 8012 | 1-Butanethiol | -2,9 | -2,9 |
| 945 | Thiophene | 14880662 | Thicyofen | -5,4 | -5,2 |
| 946 | Thiourea | 3034319 | Methiuron | -5,9 | -5,5 |
| 947 | Thiourea | 3034380 | Diafenthiuron | -7,3 | -6,2 |
| 948 | Triazine | 13290 | Methoprotryne | -6,1 | -5,6 |
| 949 | Triazine | 13450 | Terbutryn | -6,2 | -5,4 |
| 950 | Triazine | 13905 | Simetryn | -6,0 | -5,5 |
| 951 | Triazine | 14621415 | Proglinazine | -7,0 | -6,5 |
| 952 | Triazine | 15951 | Trietazine | -6,3 | -5,5 |
| 953 | Triazine | 20105 | Dipropetryn | -6,7 | -5,8 |
| 954 | Triazine | 22206 | Terbuthylazine | -6,4 | -6,0 |
| 955 | Triazine | 2256 | Atrazine | -6,2 | -6,1 |
| 956 | Triazine | 23712 | Sebuthylazine | -6,4 | -6,0 |
| 957 | Triazine | 24738 | Cyprazine | -6,7 | -5,9 |
| 958 | Triazine | 30754 | Cyanatryn | -6,0 | -5,4 |
| 959 | Triazine | 30773 | Cyanazine | -6,7 | -6,2 |
| 960 | Triazine | 36584 | Terbumeton | -6,3 | -5,7 |
| 961 | Triazine | 47866 | Cyromazine | -6,0 | -5,6 |
| 962 | Triazine | 4929 | Prometryn | -6,4 | -5,7 |
| 963 | Triazine | 4937 | Propazine | -6,5 | -6,2 |
| 964 | Triazine | 50107 | Proglinazine-ethyl | -6,7 | -6,2 |
| 965 | Triazine | 5216 | Simazine | -5,9 | -5,8 |
| 966 | Triazine | 5799 | Triethylenemelamine | -5,5 | -5,5 |
| 967 | Triazine | 7541 | Anilazine | -7,5 | -6,8 |
| 968 | Triazine | 86353 | Flupoxam | -9,1 | -7,5 |
| 969 | Triazinone | 30479 | Metribuzin | -6,4 | -5,8 |
| 970 | Triazinone | 38854 | Metamitron | -7,3 | -6,3 |
| 971 | Triazinone | 39965 | Hexazinone | -6,6 | -6,5 |
| 972 | Triazinone | 91689 | Ethiozin | -6,1 | -5,9 |
| 973 | Triazinone | 92638 | Isomethiozin | -6,8 | -5,8 |
| 974 | Triazinylsulfonylurea | 25241871 | Iofensulfuron | -8,5 | -8,2 |
| 975 | Triazinylsulfonylurea | 91756 | Ethametsulfuron-methyl | -8,2 | -8,1 |
| 976 | Triazole | 158076 | ZSTJTOHOGBHPTD-UHFFFAOYSA-N | -7,1 | -5,7 |
| 977 | Triazole | 163893 | Furconazole-cis | -7,8 | -7,0 |
| 978 | Triazole | 188694 | Furconazole | -7,6 | -6,7 |
| 979 | Triazole | 195429 | Cafenstrole | -8,3 | -7,3 |
| 980 | Triazole | 3444 | Bromuconazole | -6,9 | -5,2 |
| 981 | Triazole | 39385 | Triadimefon | -7,3 | -6,0 |
| 982 | Triazole | 41368 | Triadimenol | -7,1 | -6,6 |
| 983 | Triazole | 43233 | Azaconazole | -7,0 | -6,0 |
| 984 | Triazole | 43234 | Propiconazole | -7,2 | -6,0 |
| 985 | Triazole | 6336 | Myclobutanil | -6,4 | -5,9 |
| 986 | Triazole | 6436605 | Diniconazole | -6,9 | -5,5 |
| 987 | Triazole | 6440728 | Diniconazole-M | -6,8 | -6,0 |
| 988 | Triazole | 6537961 | Triticonazole | -8,8 | -6,3 |
| 989 | Triazole | 66461 | Hexaconazole | -6,9 | -5,9 |
| 990 | Triazole | 71309841 | PXMNMQRDXWABCY-VMIGTVKRSA-N | -8,0 | -5,9 |
| 991 | Triazole | 80277 | Tetracnazole | -7,5 | -6,8 |
| 992 | Triazole | 86132 | Cyproconazole | -7,0 | -5,4 |
| 993 | Triazole | 86138 | Fenbuconazole | -8,0 | -7,0 |
| 994 | Triazole | 86173 | Difenoconazole | -8,6 | -8,0 |
| 995 | Triazole | 86210 | Metconazole | -7,3 | -6,2 |
| 996 | Triazole | 86211 | Ipconazole | -7,8 | -6,0 |
| 997 | Triazole | 86367 | Cyprodinil | -7,5 | -7,1 |
| 998 | Triazole | 86417 | Fluquinconazole | -8,3 | -7,3 |
| 999 | Triazole | 91600 | Fluotrimazole | -9,0 | -7,4 |
| 1000 | Triazole | 91656 | Bitertanol | -8,3 | -7,4 |
| 1001 | Triazole | 91693 | Penconazole | -6,9 | -6,1 |
| 1002 | Triazole | 91727 | Flutriafol | -7,3 | -7,0 |
| 1003 | Triazole | 93483 | Imibenconazole | -8,3 | -6,5 |
| 1004 | Triazolinone | 443029 | Azafenidin | -7,9 | -6,2 |
| 1005 | Triazolinthione | 6451142 | Prothioconazole | -7,3 | -5,5 |
| 1006 | Triazolobenzothiazole | 39040 | Tricyclazole | -6,8 | -5,7 |
| 1007 | Triazolone | 177355 | Propoxycarbazone | -8,1 | -6,7 |
| 1008 | Triazolone | 443229 | Carfentrazone | -8,8 | -7,6 |
| 1009 | Triazolone | 86222 | Carfentrazone-ethyl | -8,0 | -7,7 |
| 1010 | Triazolopyrimidine | 11700495 | Florasulam | -8,7 | -7,2 |
| 1011 | Triazolopyrimidine | 11784975 | Penoxsulam | -8,5 | -7,2 |
| 1012 | Triazolopyrimidine | 86422 | Metosulam | -8,6 | -6,8 |
| 1013 | Trifluoromethanesulfonanilide | 39463 | Fluoridamid | -7,5 | -7,4 |
| 1014 | Triketone | 11188745 | Bicyclopyrone | -8,2 | -6,7 |
| 1015 | Triketone | 175967 | Mesotrione | -7,7 | -6,5 |
| 1016 | Triketone | 91760 | Sulcotrione | -8,0 | -6,4 |
| 1017 | Uracil | 11826859 | Butafenacil | -8,7 | -8,6 |
| 1018 | Uracil | 15629 | Monolinuron | -6,4 | -5,3 |
| 1019 | Uracil | 16559 | Lenacil | -7,5 | -7,1 |
| 1020 | Uracil | 179983 | Flupropacil | -8,4 | -7,3 |
| 1021 | Uracil | 22188 | Terbacil | -6,3 | -5,3 |
| 1022 | Uracil | 27375 | Chlorotoluron | -6,7 | -5,8 |
| 1023 | Uracil | 29216 | Methabenzthiazuron | -7,0 | -5,7 |
| 1022 | Uracil | 9412 | Isocil | -5,9 | -5,4 |
| 1023 | Urea | 13880 | 1-Methyl-3-phenylurea | -5,8 | -5,6 |
| 1024 | Urea | 16007 | Benzthiazuron | -6,6 | -6,0 |
| 1025 | Urea | 16115 | Chloroxuron | -8,0 | -7,4 |
| 1026 | Urea | 16554 | Cycluron | -6,4 | -5,4 |
| 1027 | Urea | 16556 | Noruron | -6,8 | -6,0 |
| 1028 | Urea | 18290 | Metobromuron | -6,4 | -5,1 |
| 1029 | Urea | 18870 | 3-(4-Bromophenyl)-1,1-dimethylurea | -6,3 | -5,2 |
| 1030 | Urea | 25912 | Chlorbromuron | -6,6 | -5,4 |
| 1031 | Urea | 29863 | Metoxuron | -6,5 | -5,5 |
| 1032 | Urea | 3035253 | Isonoruron | -7,5 | -5,3 |
| 1033 | Urea | 36679 | Isoproturon | -6,9 | -5,6 |
| 1034 | Urea | 5383 | Tebuthiuron | -6,9 | -5,6 |
| 1035 | Urea | 67788 | Flucofuron | -9,4 | -7,8 |
| 1036 | Urea | 7560 | Fenuron | -6,1 | -5,7 |
| 1037 | Urea | 8453 | 2-Imidazolidinone | -3,9 | -4,0 |
| 1038 | Urea | 9502 | Linuron | -6,6 | -5,5 |

**Table 3S**. Physicochemical properties of the pesticides with best affinity values for DNMTs.

| **Properties/Name** | **Flocoumafen** | **Difenacoum** | **Bromadiolone** | **Brodifacoum** | **Hydramethylnon** |
| --- | --- | --- | --- | --- | --- |
| Molecular Weight | 542.554 g/mol | 444.53 g/mol | 527.414 g/mol | 523.426 g/mol | 494.485 g/mol |
| Solubility | Acetone >600  Ethanol 34  Xylene 33  Octanol 44 (all in g/l).  Water, 1.10 mg/l, temp not specified | In water at 20 deg C, 84 mg/L (pH 9.3) | Water, >1.14X10+4 at pH 5, 2 | In water, 0.24 mg/L at 20 deg C and pH 7.4 | Water Solubility  1.21e-08 M |
| Density | 1.4 g/cm³ | 1.27 at 21.5 deg C | 1.45 at 20.5 deg C | 1.4 g/cc at 25 deg C (92.5% w/w) | 1.2816 (estimate) |
| Vapor Pressure | 1.0X10-12 mm Hg @ 25 deg C | 5.0X10-11 mm Hg at 25 deg C (Estimated high-end value) | 2.13X10-8 Pa at 25 deg C = 1.6X10-10 mm Hg at 25 deg C (extrapolated) | 1.1X10-18 mm Hg at 25 deg C (est) | 2.03e-08 mmHg |
| LogP | 6.12 (20 °C) | 7.6 | 6.1 | 8.5 | 2.31 |
| Hydrogen Bond Donor Count | 1 | 1 | 2 | 1 | 2 |
| Hydrogen Bond Acceptor Count | 7 | 3 | 4 | 3 | 8 |
| Rotatable Bond Count | 5 | 3 | 6 | 3 | 6 |
| XLogP3-AA | 7,7 | 6.9 | 6.1 | 7.6 | 6.4 |
| Covalently-Bonded Unit Count | 1 | 1 | 1 | 1 | 1 |

**Table 4S. Chemical interactions for DNMT1- and DNMT3-pesticide complexes.**

| **Pesticide** | **DNMT1 residues** | **DNMT3 residues** |
| --- | --- | --- |
| **Flocoumafen** | Asn793A  Pro739A  Lys740A  Glu741A | Leu 1247A  Met 1169A  Phe 1145A  Trip1170A  Glu1168A  Arg1574A |
| **Brodifacoum** | Leu12474  Phe1145A  Met1169A  Trp1170A | Gln688A  Arg271B  Lys740A  Glu303B |
| **Bromadialone** | Ans1578A  Trp1170A  Phe11454  Arg1574A  Prol225A | Arg763A  Ser766A  Arg767A  Glu770A  Val228B |
| **Difenacoum** | Glu698A  Pro1225A  Arg1574A  Trp1170A | Glu303B  Arg271B  Glu741A  Lys740A |
| **Hydramethylnon** | Met1169A  Phe1145A  Trp1170A  Ans78A | Val683A  Val754A  Phe636A  Lue726A  Val661A  Cys706A  Thr723A |

**Table 5S.** AutoDock Vina affinities for DNMT inhibitors and theirs half maximal inhibitory concentrations (IC50).

| **No.** | **Pubchem_CID** | **IC50a** | **logIC50** | **kcal/mol AVb** |
| --- | --- | --- | --- | --- |
| 1 | 9642771 | 4.29 | 0.63 | -10.4 |
| 2 | 6874905 | 4.81 | 0.68 | -9.6 |
| 3 | 5769297 | 5.00 | 0.70 | -9.3 |
| 4 | 1211043 | 5.12 | 0.71 | -9.4 |
| 5 | 4263533 | 5.32 | 0.73 | -9.5 |
| 6 | 6906548 | 5.40 | 0.73 | -10.1 |
| 7 | 2354598 | 5.40 | 0.73 | -9.3 |
| 8 | 16745478 | 5.43 | 0.73 | -9.7 |
| 9 | 1596435 | 5.58 | 0.75 | -9.2 |
| 10 | 2364091 | 5.78 | 0.76 | -10.2 |
| 11 | 15944767 | 5.93 | 0.77 | -9.4 |
| 12 | 16745457 | 5.96 | 0.78 | -9.3 |
| 13 | 24980908 | 6.24 | 0.80 | -10.1 |
| 14 | 2092254 | 7.11 | 0.85 | -9.5 |
| 15 | 5736971 | 7.18 | 0.86 | -9.5 |
| 16 | 5583816 | 8.31 | 0.92 | -8.7 |
| 17 | 3741364 | 8.67 | 0.94 | -8.8 |
| 18 | 16318005 | 9.08 | 0.96 | -9.0 |
| 19 | 1488927 | 9.12 | 0.96 | -9.0 |
| 20 | 25102417 | 9.26 | 0.97 | -8.5 |
| 21 | 44825342 | 9.98 | 1.00 | -8.6 |
| 22 | 6216247 | 10.10 | 1.00 | -9.3 |
| 23 | 4790991 | 11.30 | 1.05 | -8.2 |
| 24 | 2052803 | 11.50 | 1.06 | -8.3 |
| 25 | 2178158 | 12.30 | 1.09 | -8.2 |
| 26 | 24979922 | 13.90 | 1.14 | -9.1 |
| 27 | 2088816 | 14.60 | 1.16 | -8.4 |
| 28 | 812129 | 18.10 | 1.26 | -8.3 |

**Table 6S. Environmental concentrations for potential ligands of DNMTs.**

| **Compounds** | **Sample/place** | **Concentration** | **References** |
| --- | --- | --- | --- |
| Flocoumafen | Wastewater | 29,3 ng L-1 | Gómez et al., 2014 |
| Fishs | 0.3 μg kg−1 | Kotthoff et al., 2018 |
| Difenacoum | Wastewater | 0.8-6.5 ng L-1 | Gómez et al., 2014 |
| Fish | 0.7 μg kg−1 | Kotthoff et al., 2018 |
| Bromadiolona | Wastewater | 3.59-59.8 ng L-1 | Gómez et al., 2014 |
| Fish | 7.1 μg kg−1 | Kotthoff et al., 2018 |
| Sludge | 7.73 ng L-1 | Gómez-Canela & Lacorte, 2016 |
| Surface wáter | 6.2 ng L-1 | Gómez-Canela & Lacorte, 2016 |
| Agricultural soil | 0.72 μg kg−1 | Regnery et al., 2018 |
| Suspended particulate matter | 9.2 μg/kg | Regnery et al., 2018 |
| Brodifacoum | Wastewater | 38.4 ng L-1 | Gómez et al., 2014 |
| Fish | 12.5 μg kg−1 | Kotthoff et al., 2018 |
| Sludge | 17.4 ng L-1 | Gómez-Canela & Lacorte, 2016 |
| Surface water | 1.4 ng L-1 | Gómez-Canela & Lacorte, 2016 |
| Sediment | 1.5 μg kg−1 | Regnery et al., 2018 |
| Agricultural soil | 1.9 μg kg−1 | Regnery et al., 2018 |
| Surface water | 0.56 µg/L | Chen et al., 2014 |
